# Supplementary material for: Enantioselective formal [2+2] cycloaddition of ketenes with nitroso compounds catalyzed by N-heterocyclic carbenes
Source: Royal Society of Chemistry journal article supplement (doi:10.1039/c0ob00249f), 2010-01-01

## Electronic Supplementary Information

# Enantioselective Formal [2+2] Cycloaddition of Ketenes with Nitroso Compounds Catalyzed by N-heterocyclic Carbenes

Tong Wang, Xue-Liang Huang and Song Ye\*

Beijing National Laboratory for Molecular Sciences, Laboratory of  
Chemical Biology, Institute of Chemistry, Chinese Academy of Sciences,

Beijing 100190, China

[songye@iccas.ac.cn](mailto:songye@iccas.ac.cn)

### Table of Contents

|                                                                          |    |
|--------------------------------------------------------------------------|----|
| Part I Copies of <sup>1</sup> H-NMR and <sup>13</sup> C-NMR Spectra..... | 2  |
| Part II Copies of HPLC spectra .....                                     | 15 |
| Part III Copies of CD spectra.....                                       | 28 |

Part II Copies of <sup>1</sup>H-NMR and <sup>13</sup>C-NMR Spectra.

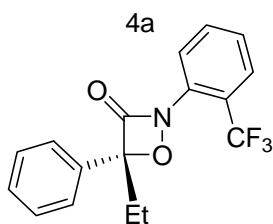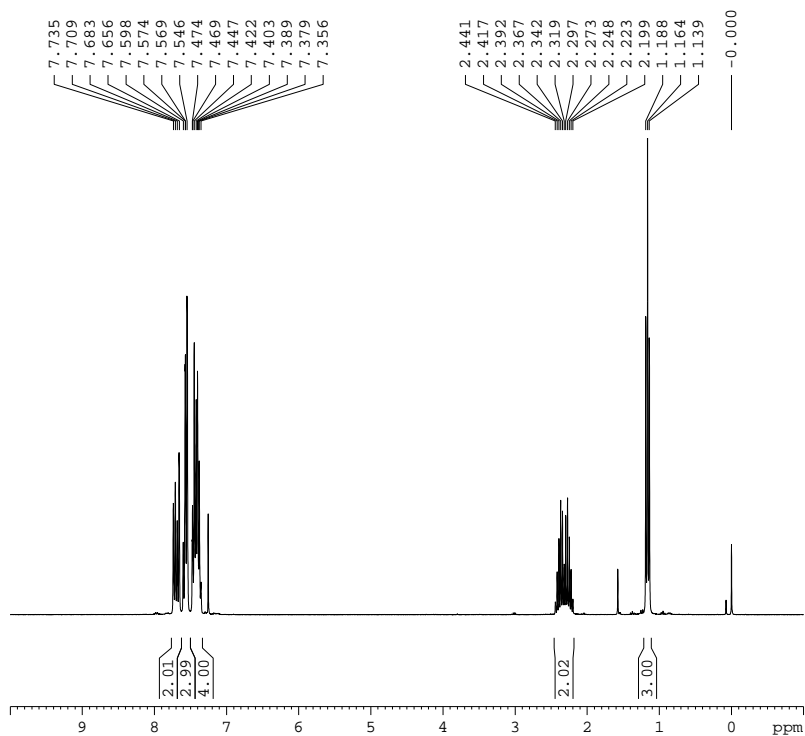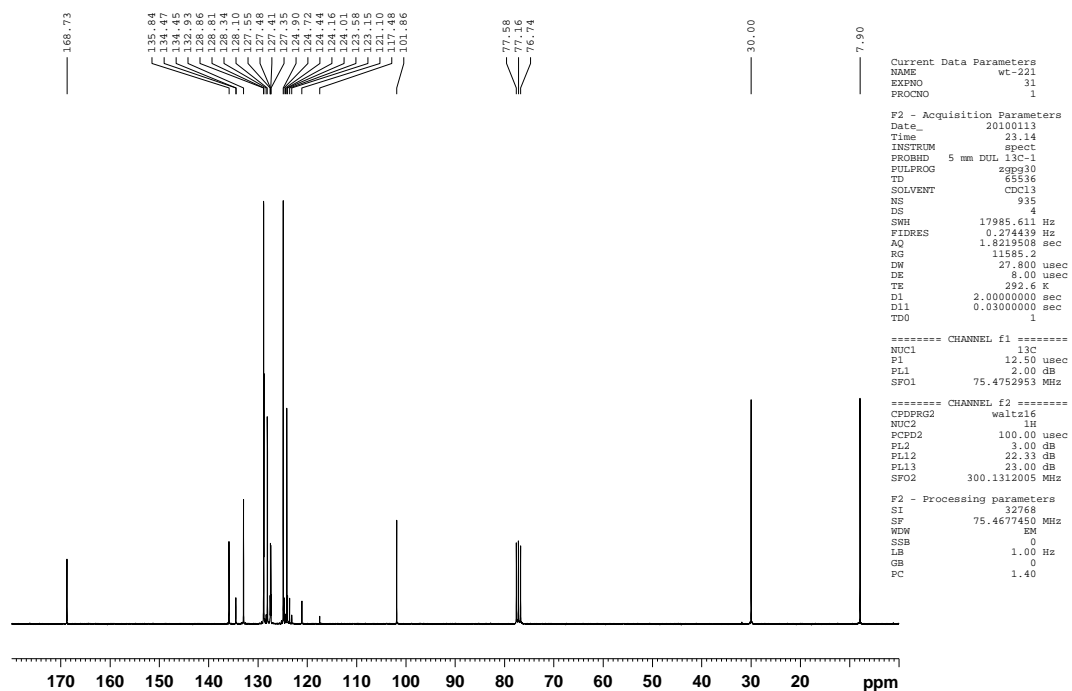

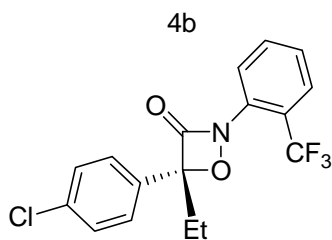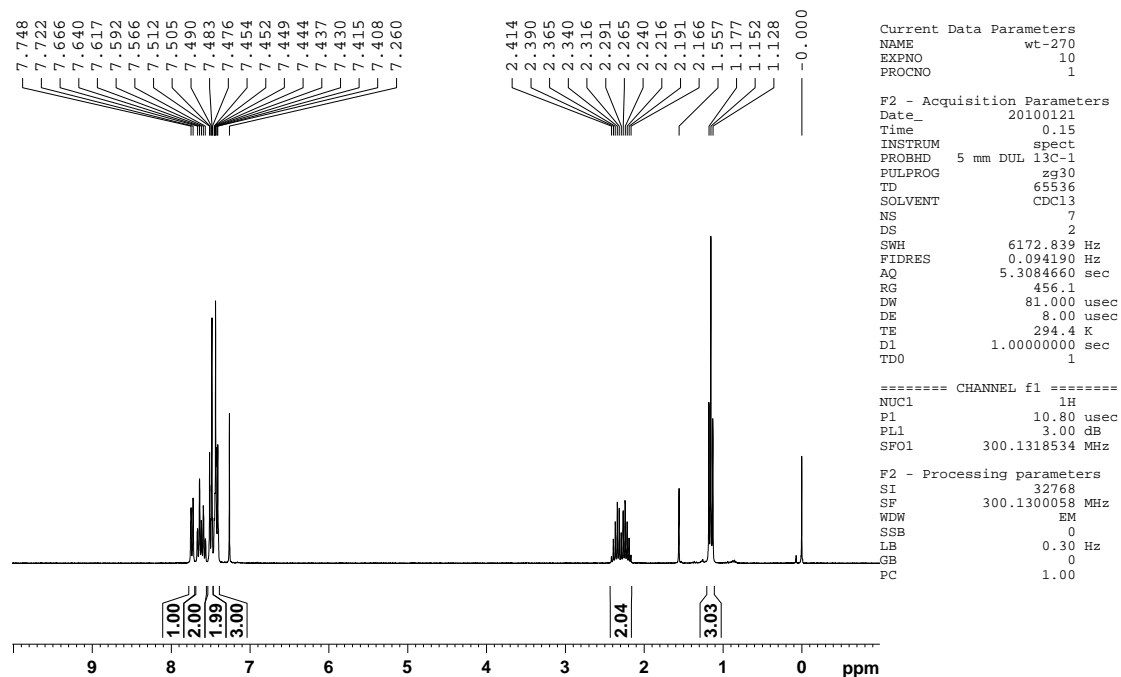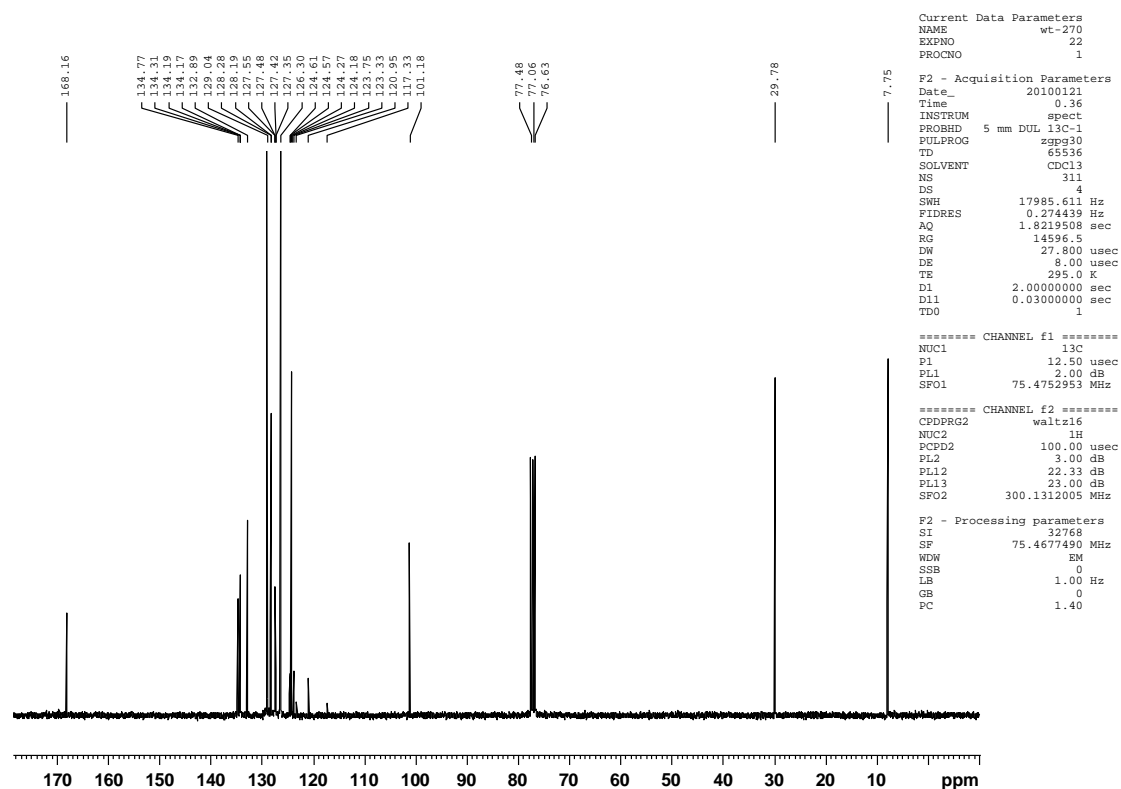

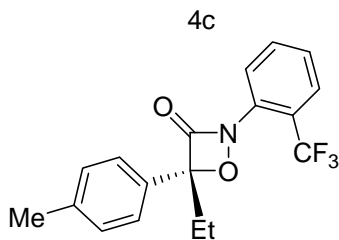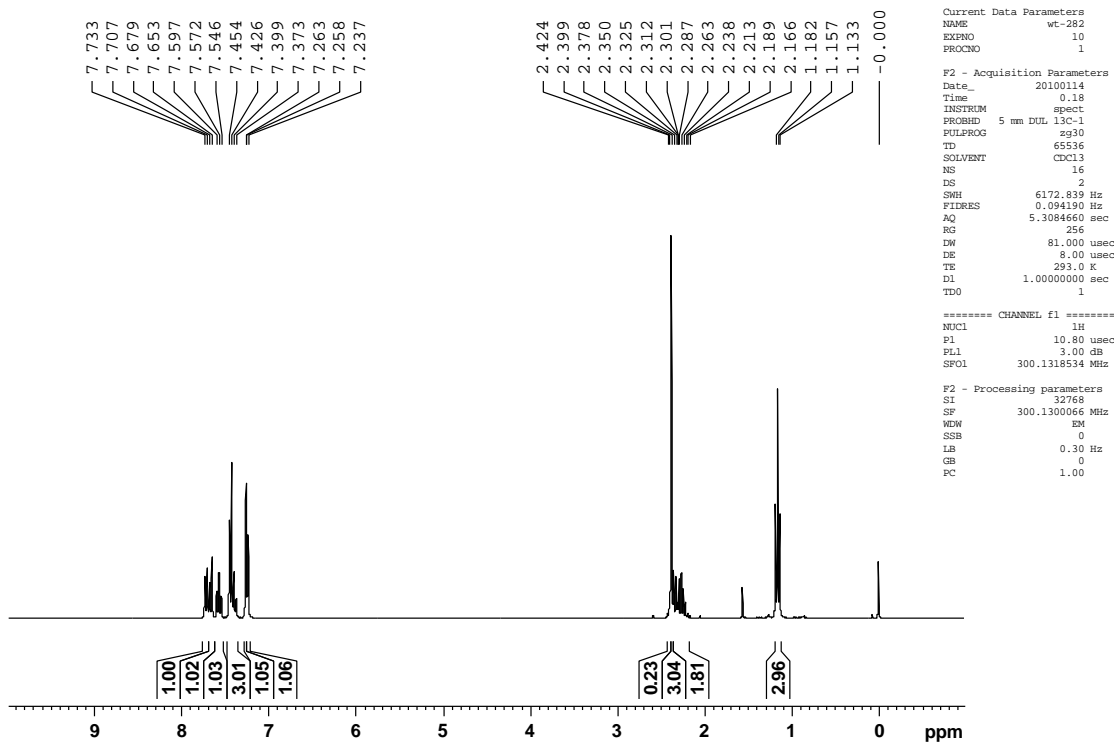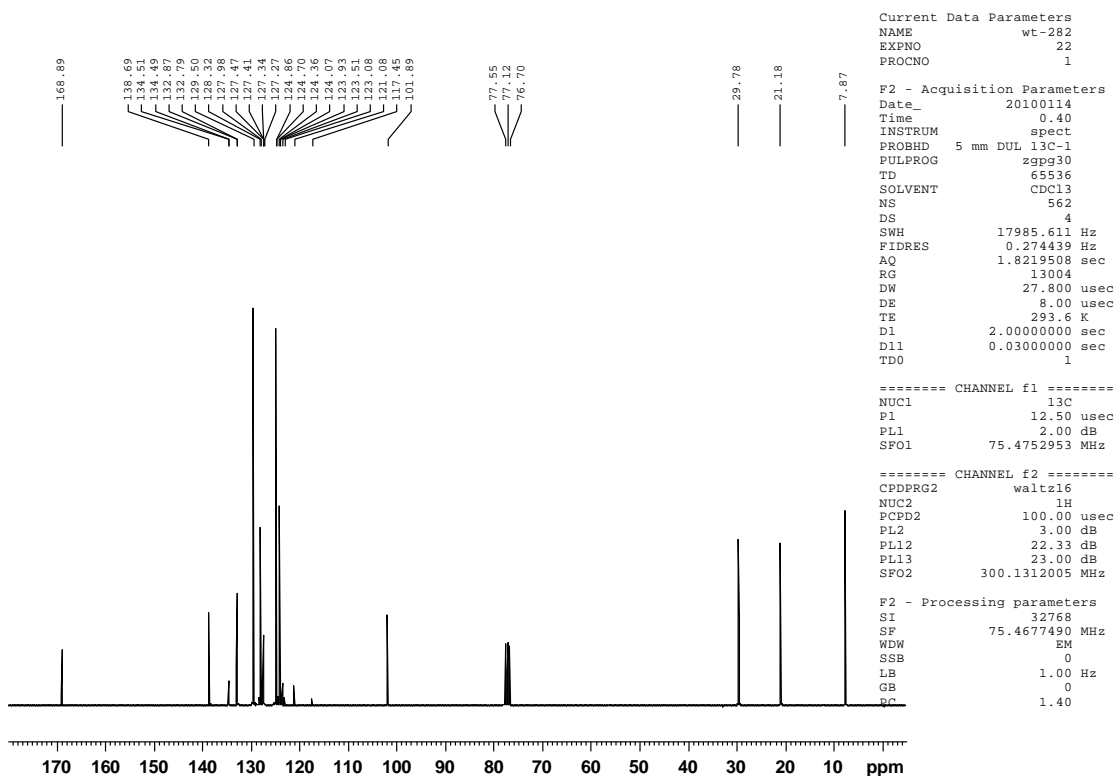

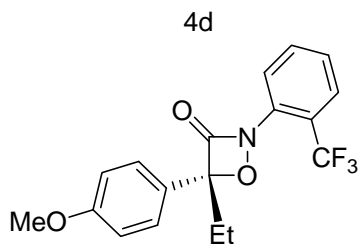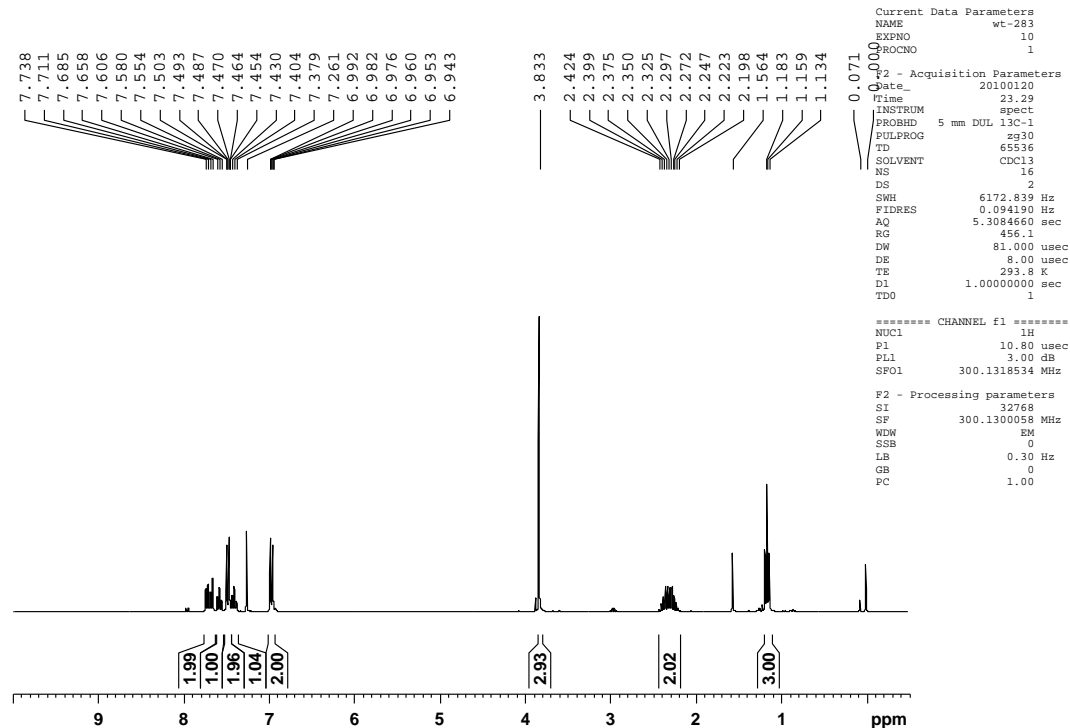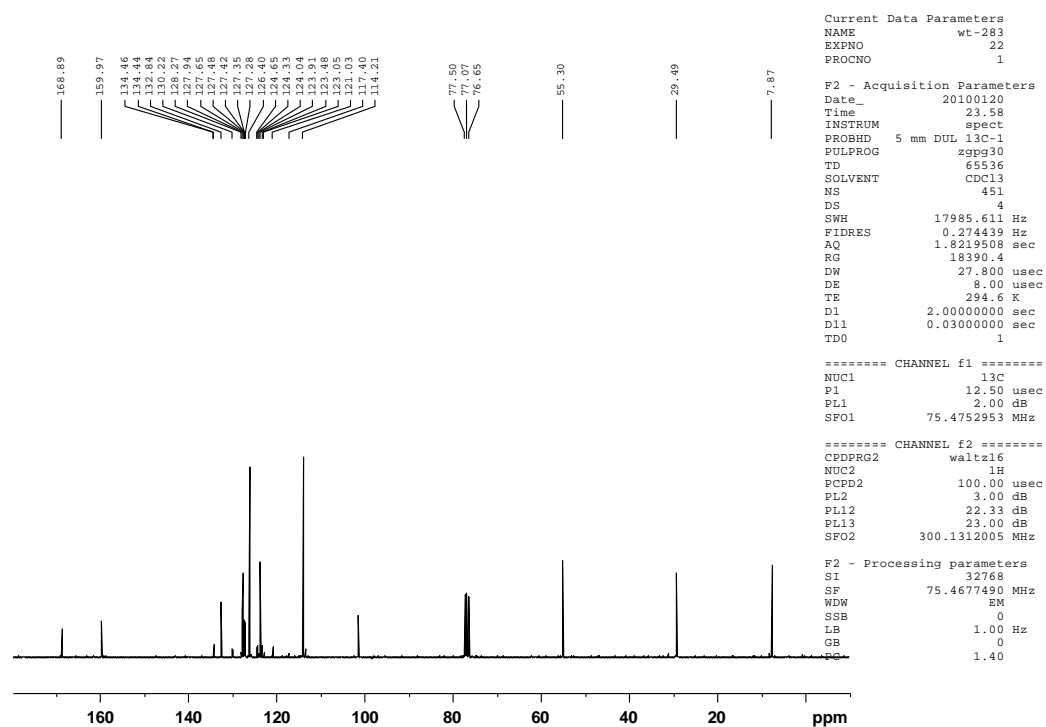

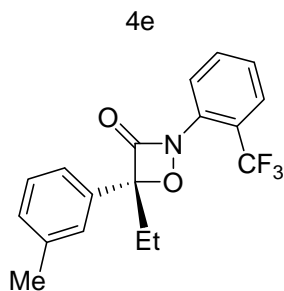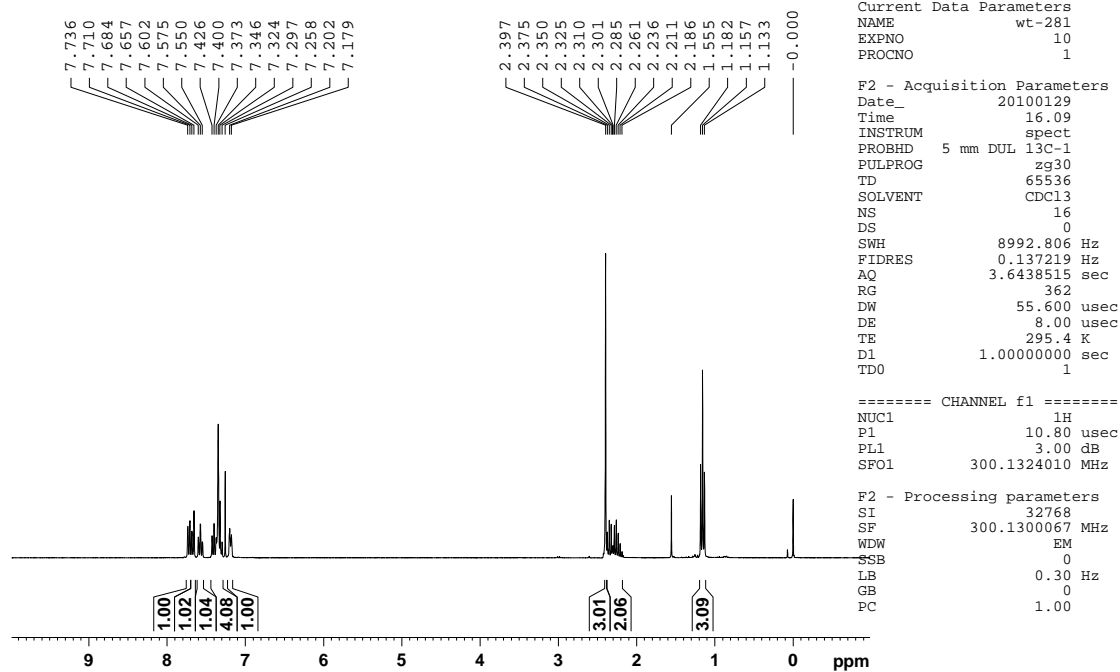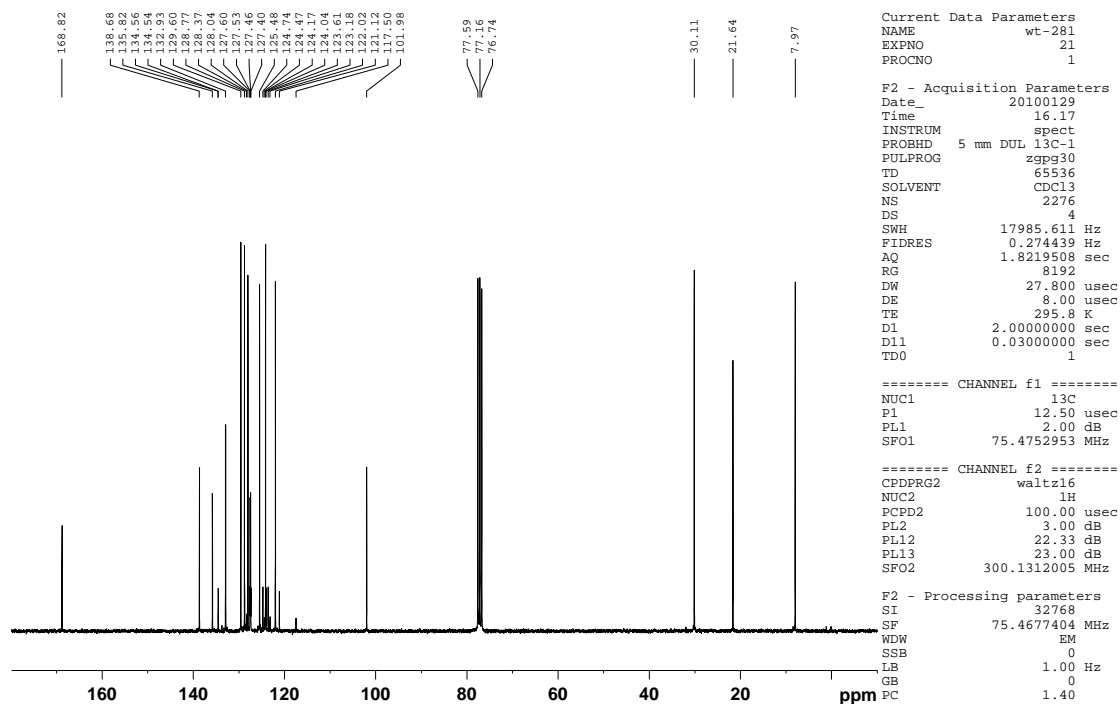

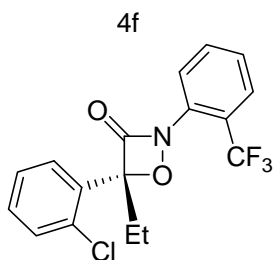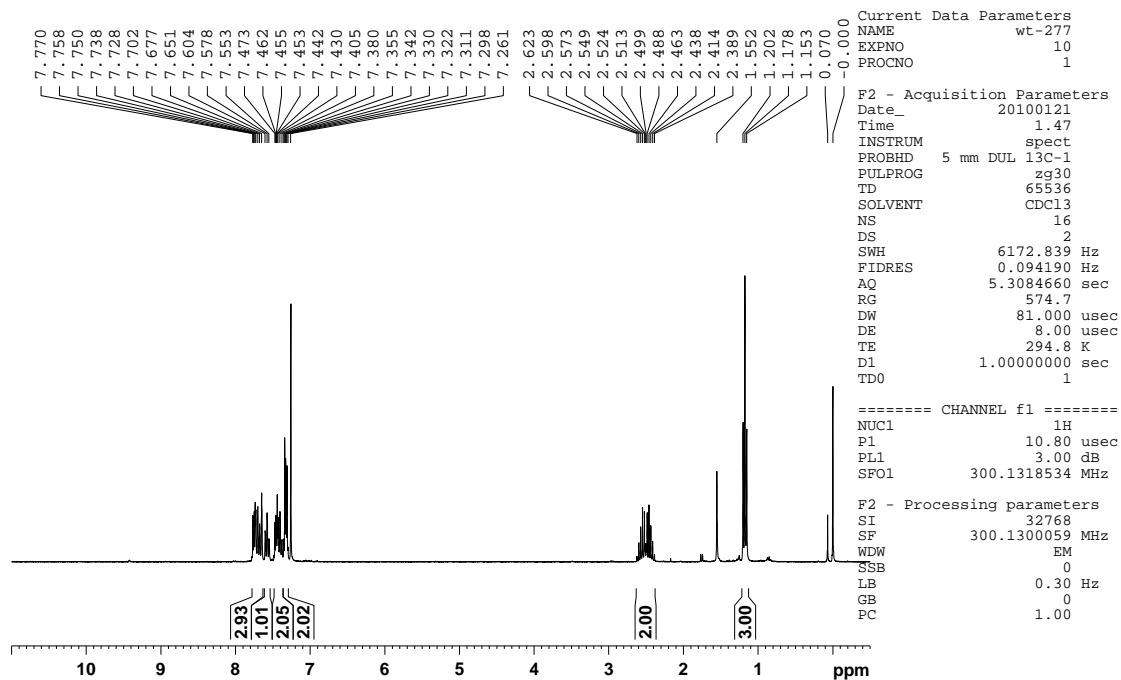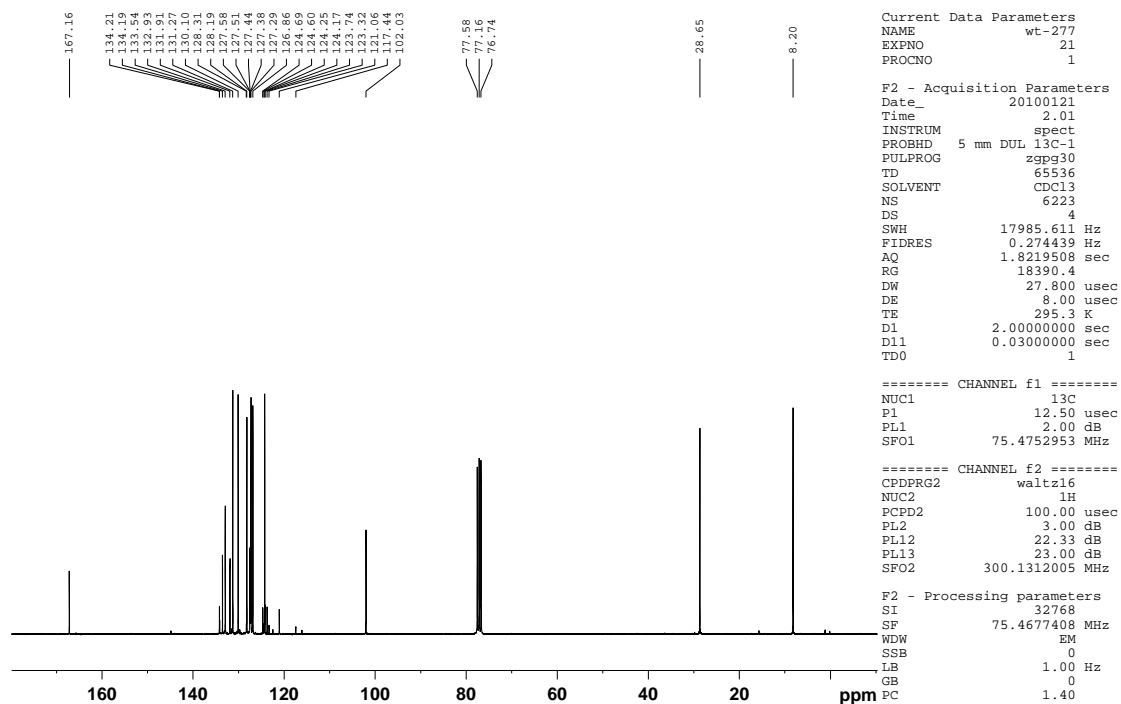

4g

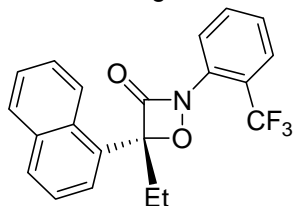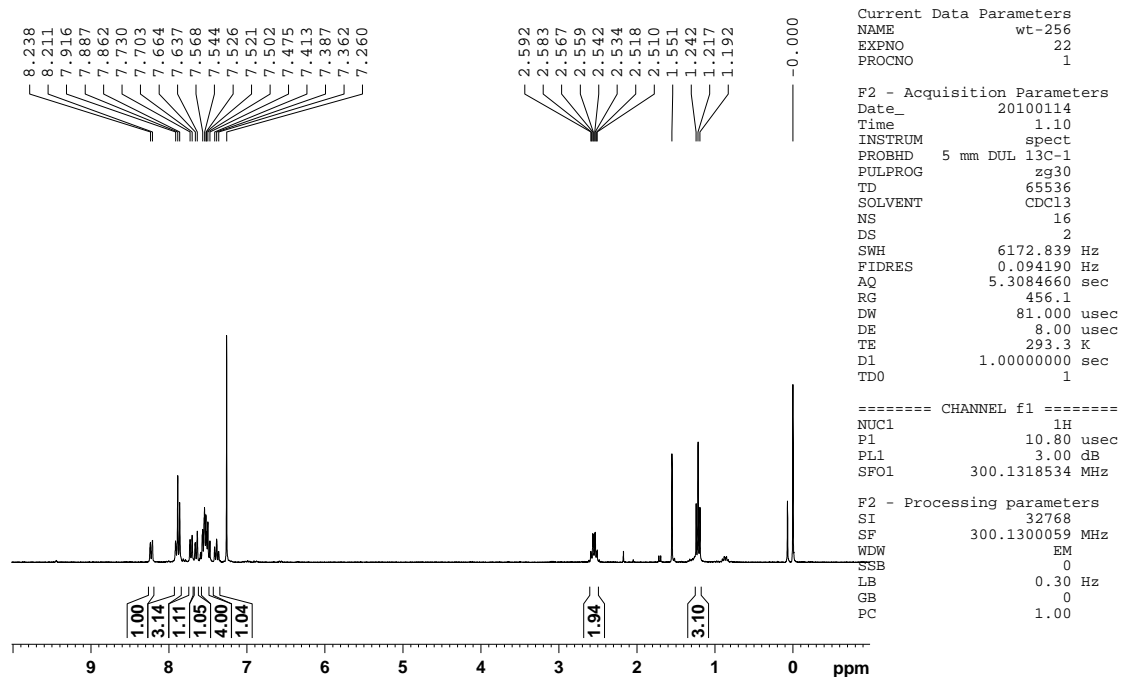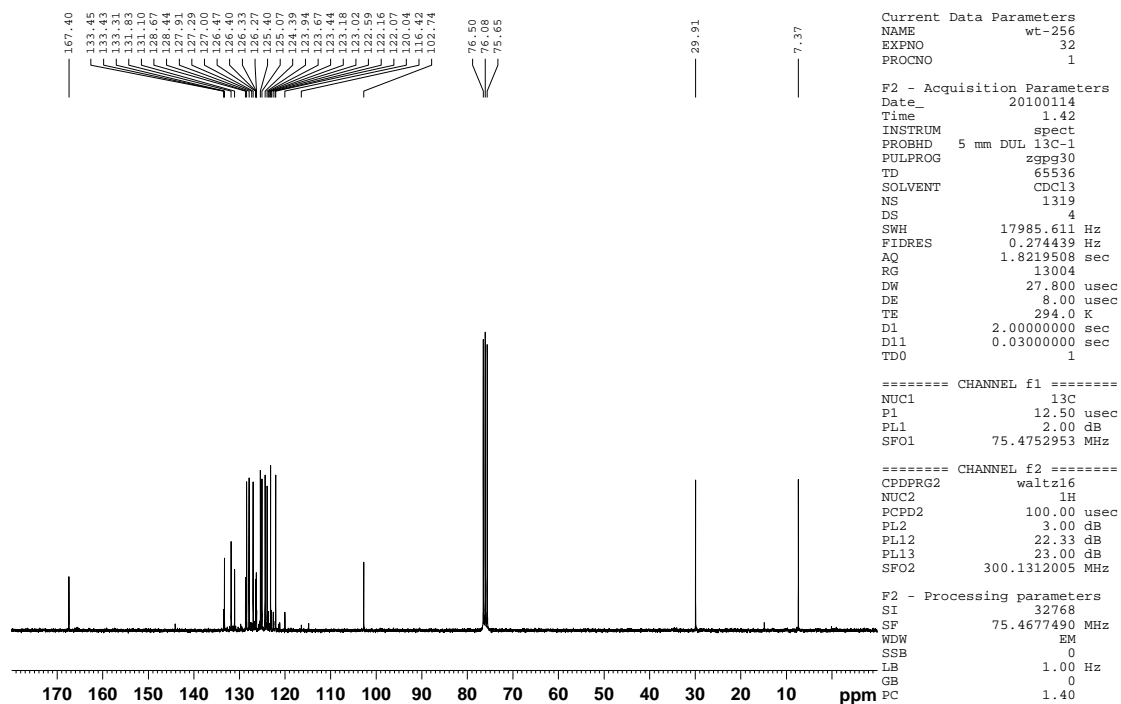





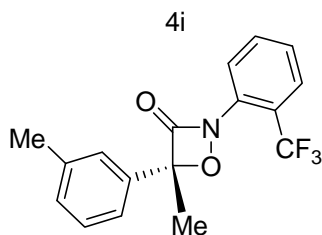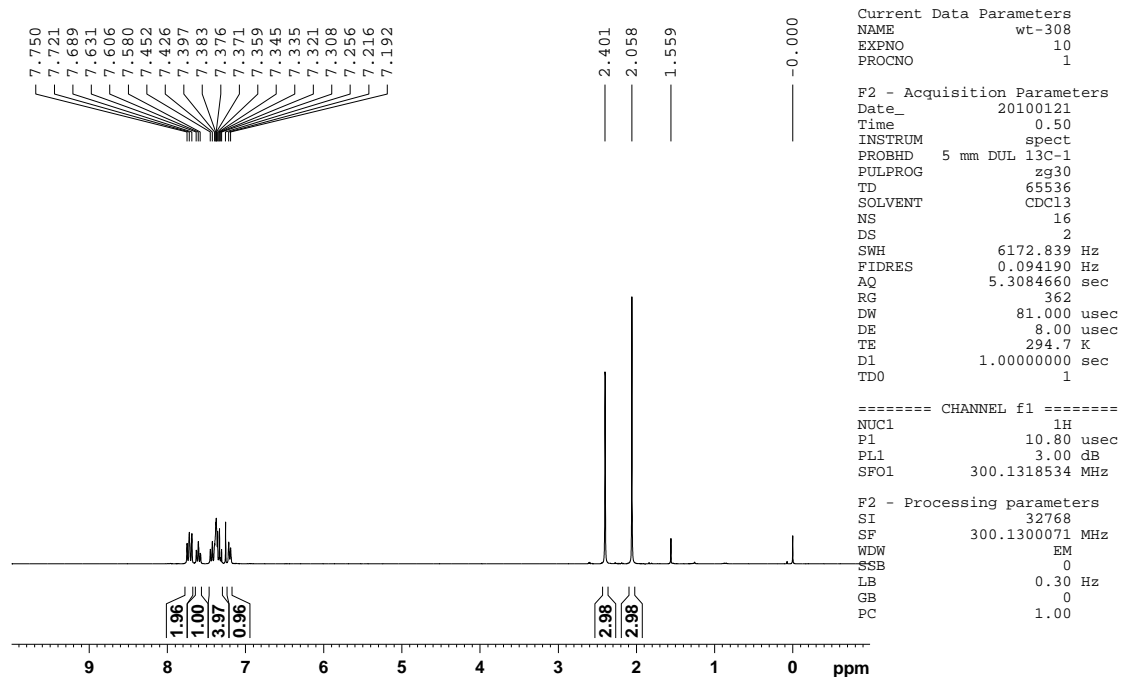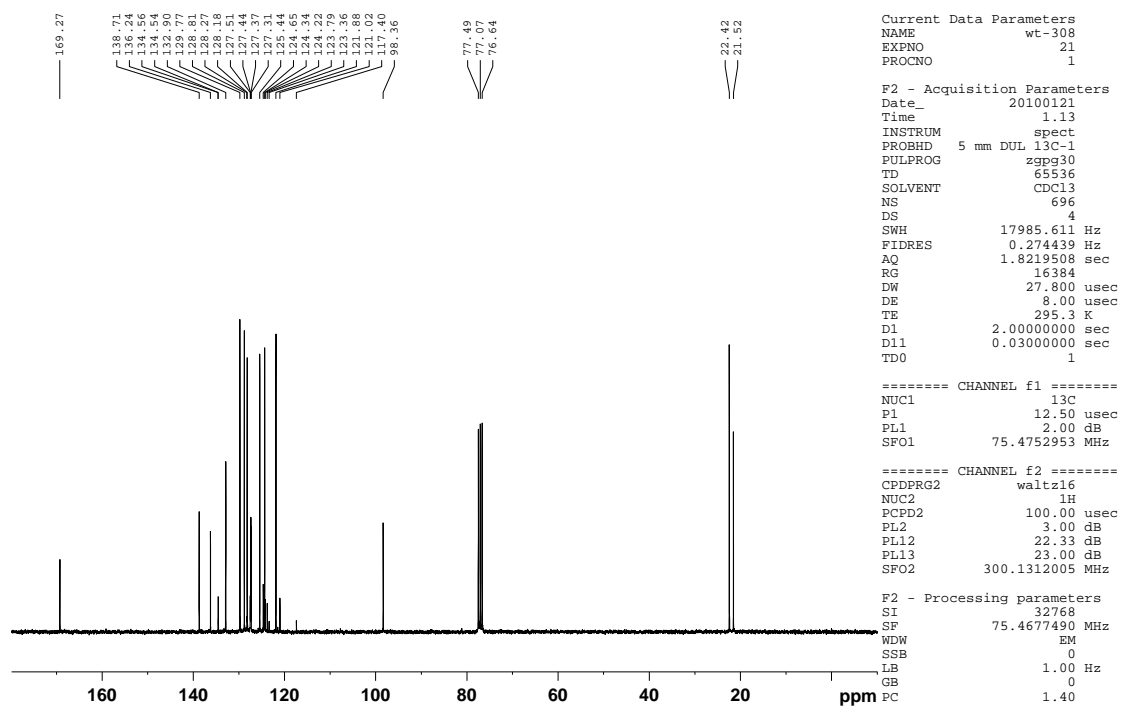

4j

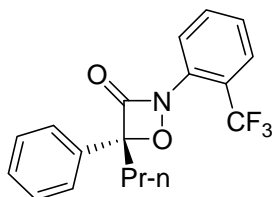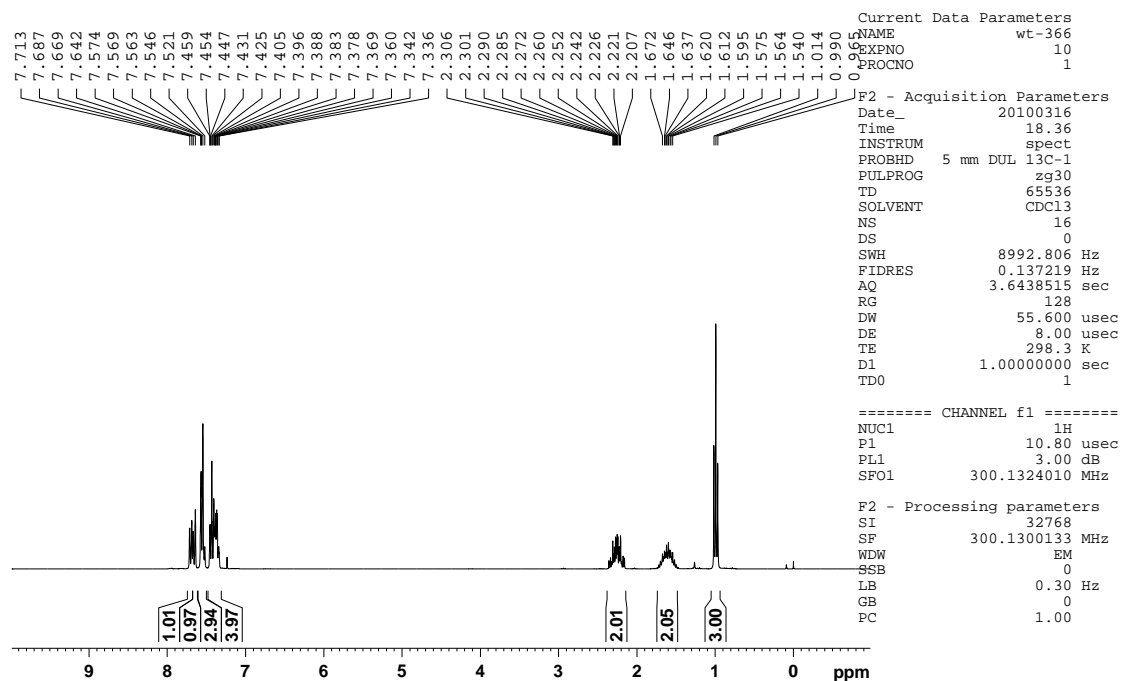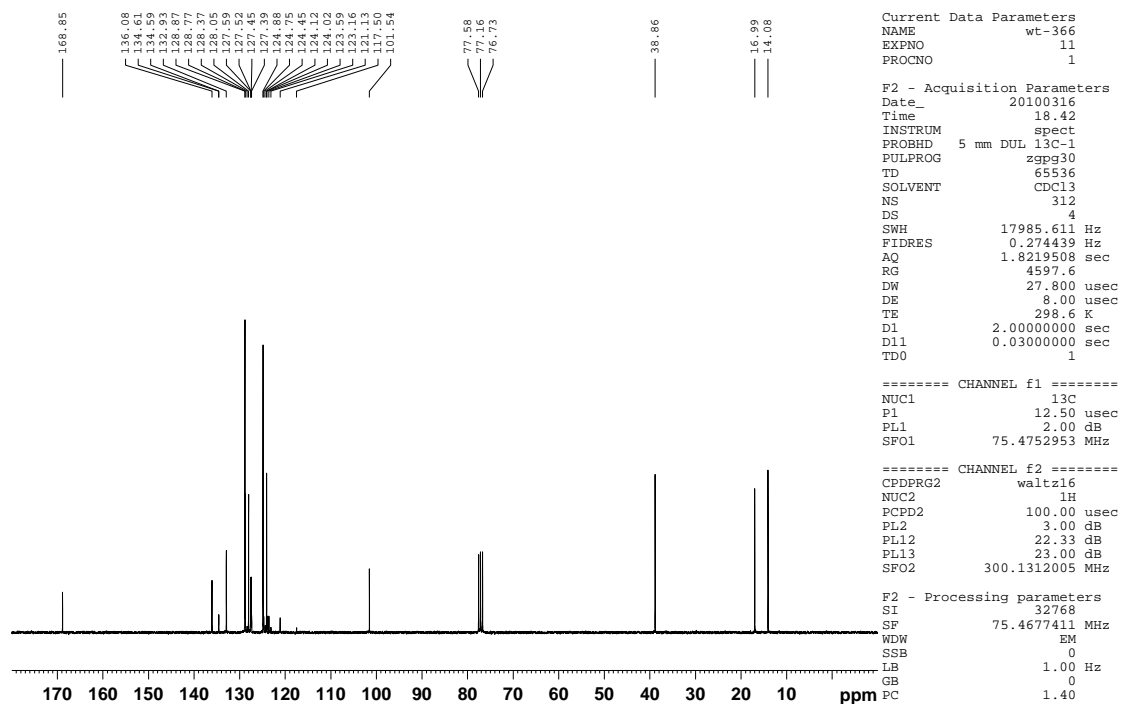

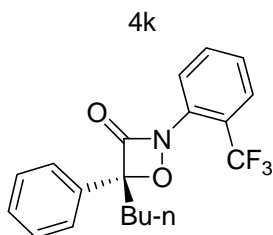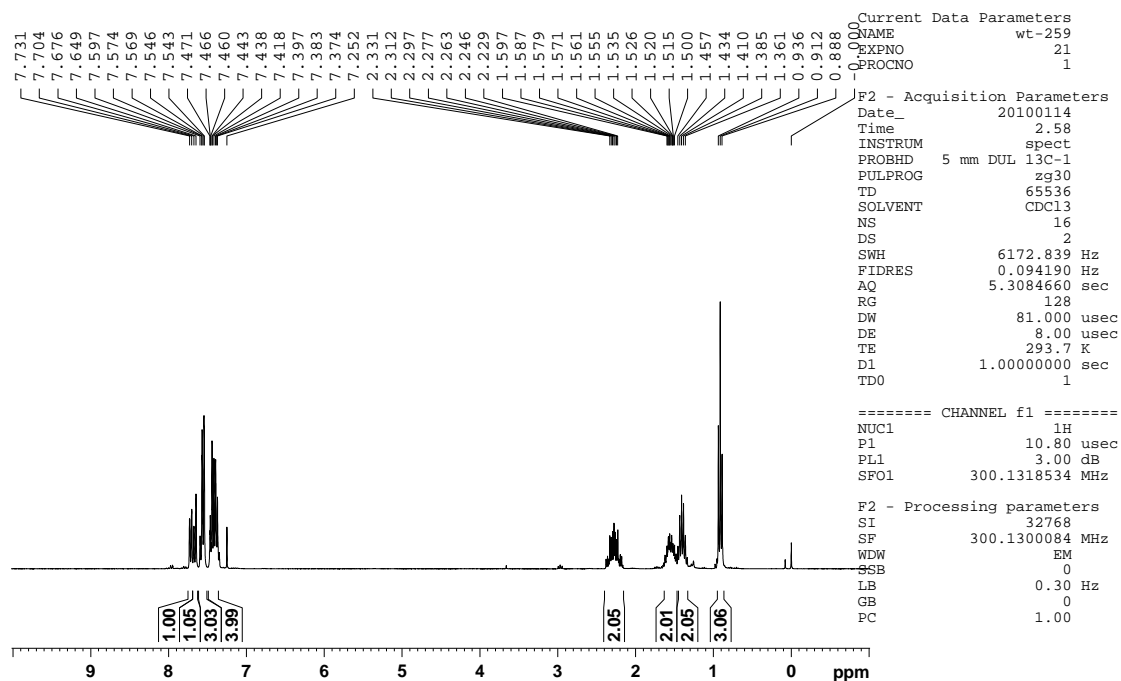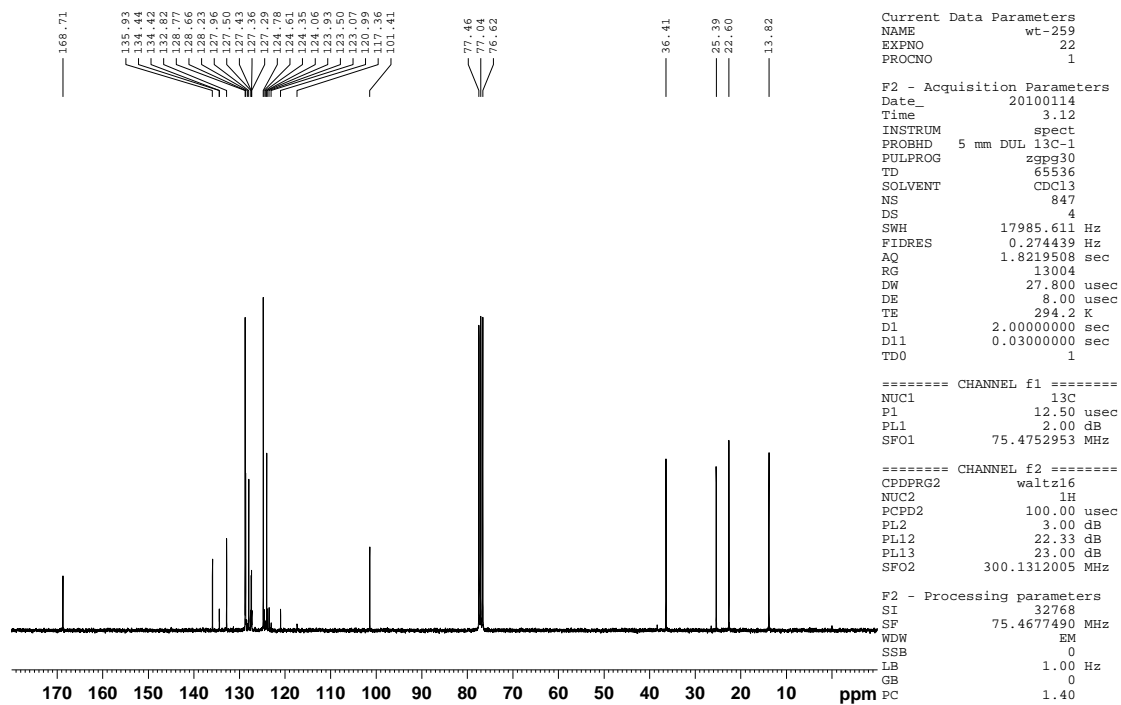

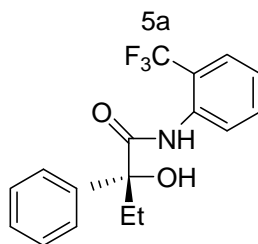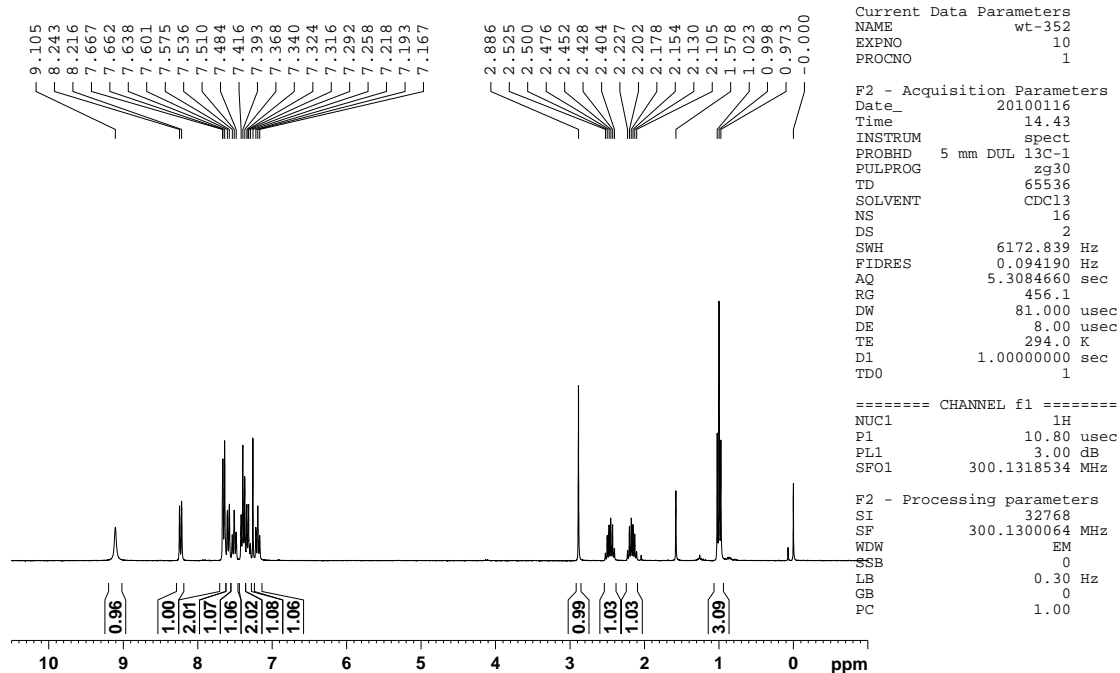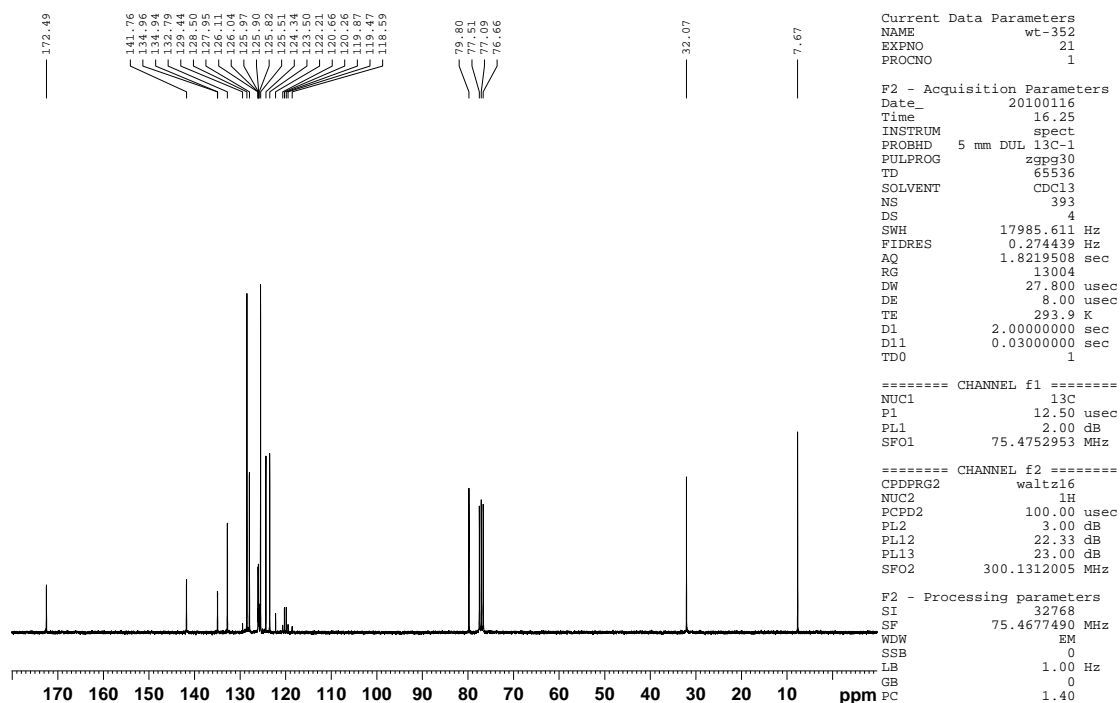

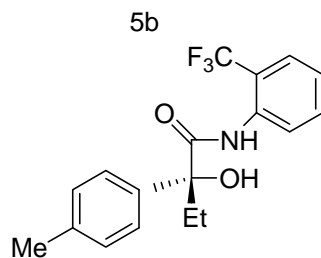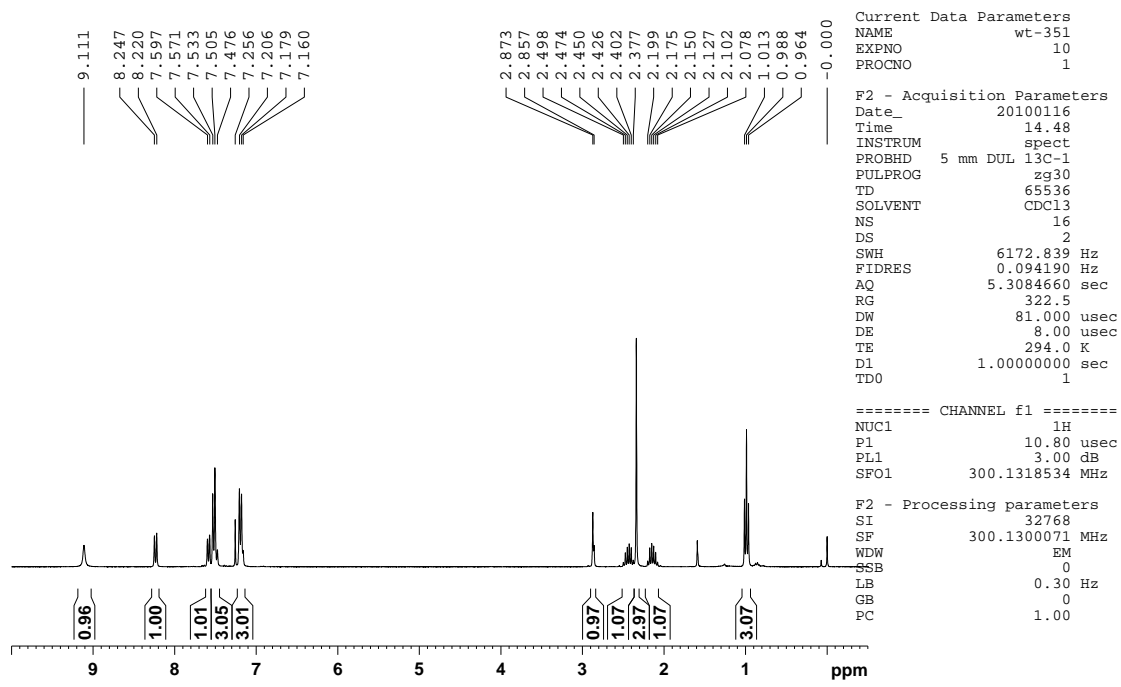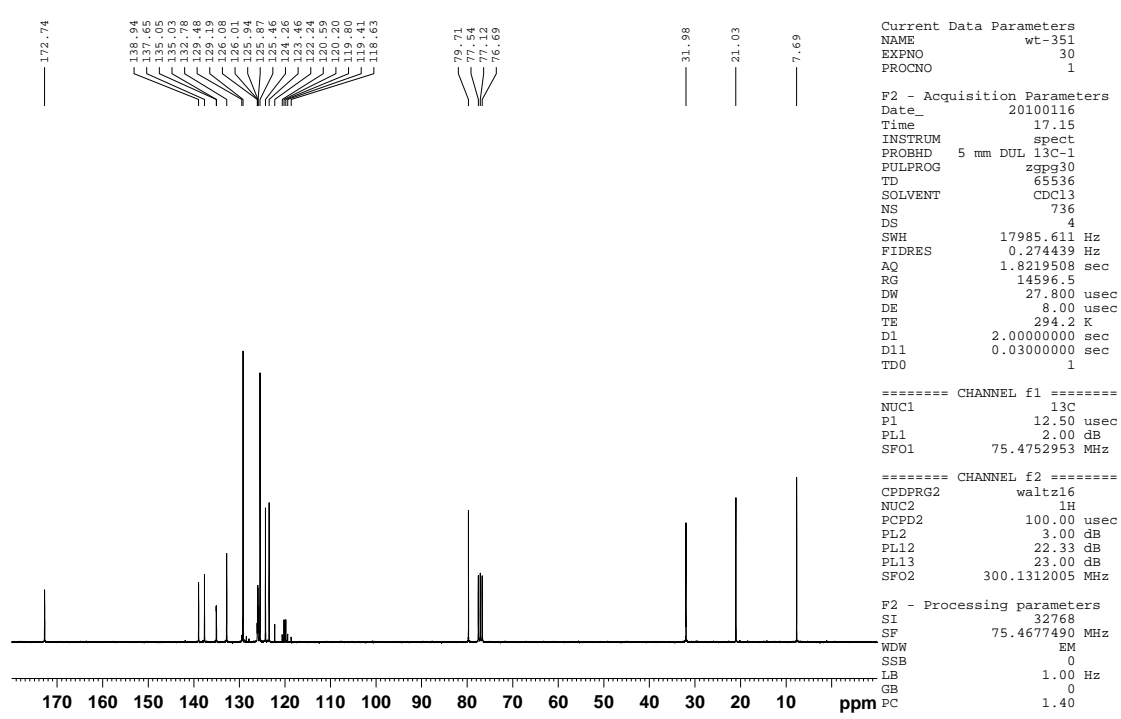

### Part III Copies of HPLC spectra

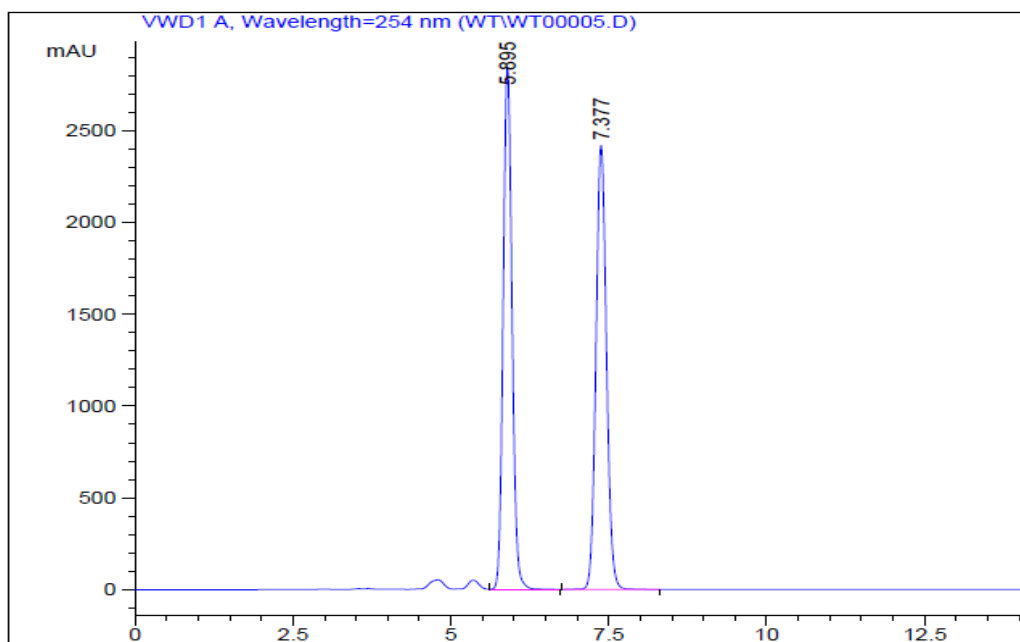

| Peak # | RetTime [min] | Type | Width [min] | Area mAU *s | Height [mAU] | Area %  |
|--------|---------------|------|-------------|-------------|--------------|---------|
| 1      | 5.895         | VB   | 0.1520      | 2.78133e4   | 2843.62207   | 49.9084 |
| 2      | 7.377         | BB   | 0.1798      | 2.79154e4   | 2419.15967   | 50.0916 |

Sample Info : AD-H Hex:Ipr=99:1 mL/min

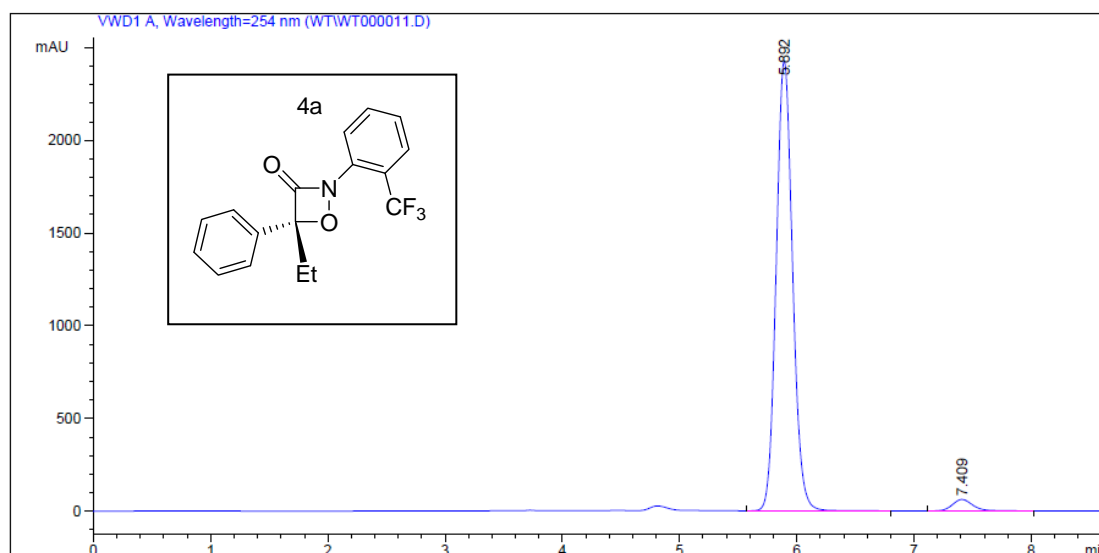

| Peak # | RetTime [min] | Type | Width [min] | Area mAU *s | Height [mAU] | Area %  |
|--------|---------------|------|-------------|-------------|--------------|---------|
| 1      | 5.892         | VB   | 0.1512      | 2.35810e4   | 2427.33716   | 96.9117 |
| 2      | 7.409         | VB   | 0.1857      | 751.46790   | 61.72149     | 3.0883  |

Sample Info :  
 99:1 AD-H 1ML/min

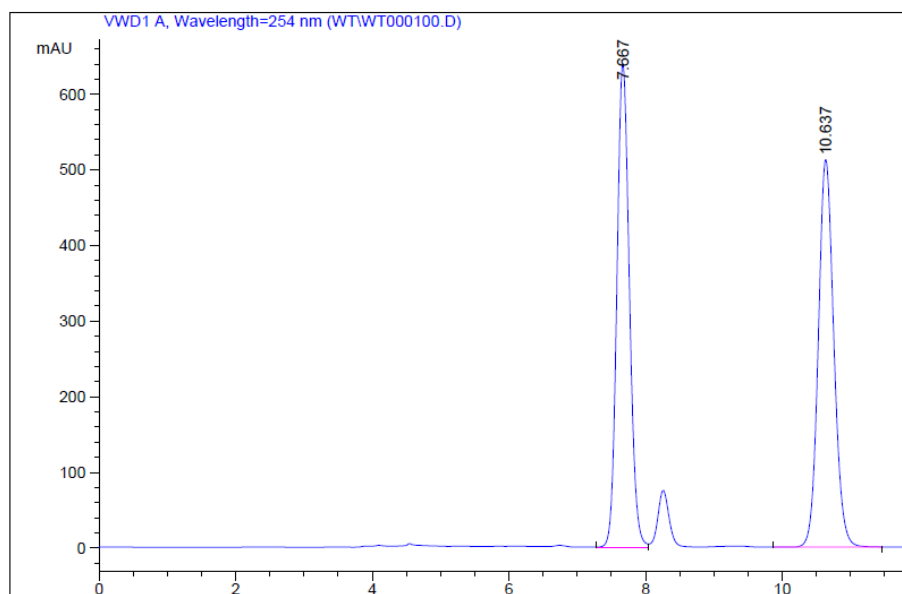

| Peak # | RetTime [min] | Type | Width [min] | Area mAU *s | Height [mAU] | Area %  |
|--------|---------------|------|-------------|-------------|--------------|---------|
| 1      | 7.667         | VV   | 0.1961      | 8117.27295  | 639.68127    | 50.0627 |
| 2      | 10.637        | VB   | 0.2440      | 8096.94043  | 512.53278    | 49.9373 |

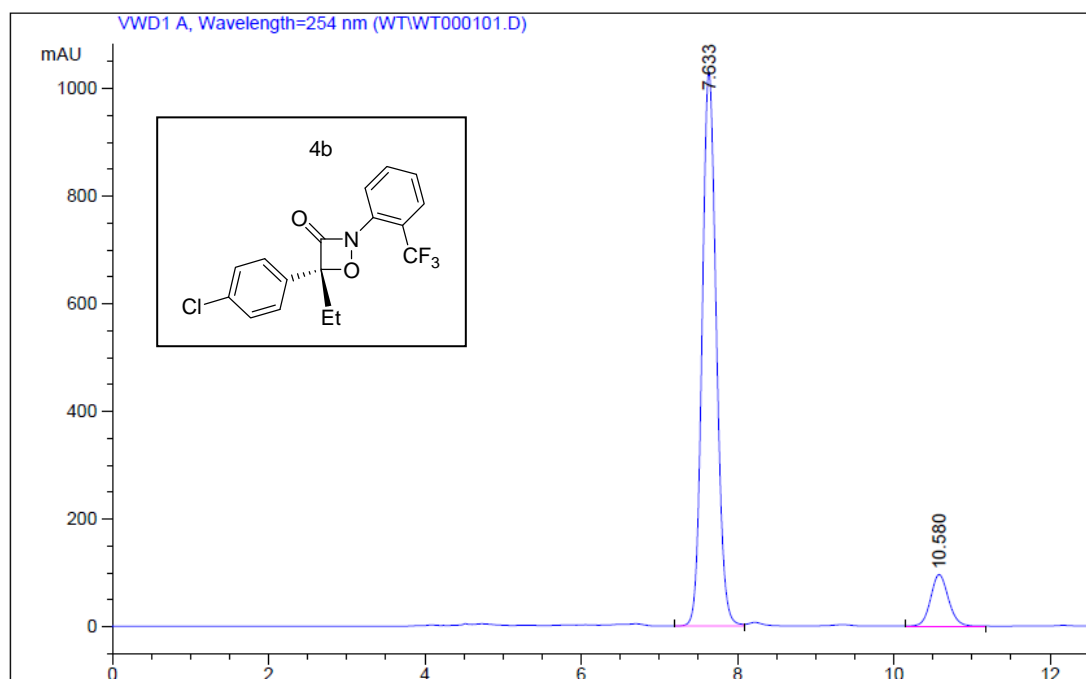

| Peak # | RetTime [min] | Type | Width [min] | Area mAU *s | Height [mAU] | Area %  |
|--------|---------------|------|-------------|-------------|--------------|---------|
| 1      | 7.633         | VV   | 0.1953      | 1.29938e4   | 1029.73047   | 89.5527 |
| 2      | 10.580        | BB   | 0.2428      | 1515.87634  | 95.84657     | 10.4473 |



Sample Info : AD-H Hex:Ipr=99:1 1.0  
 ml/min

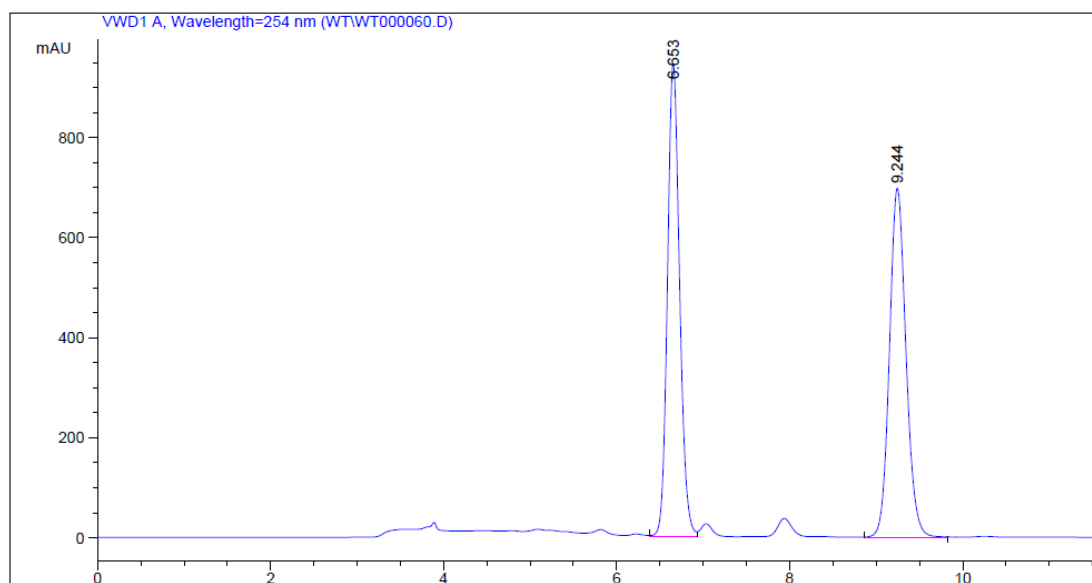

| Peak # | RetTime [min] | Type | Width [min] | Area mAU *s | Height [mAU] | Area %  |
|--------|---------------|------|-------------|-------------|--------------|---------|
| 1      | 6.653         | VV   | 0.1502      | 9234.64844  | 946.43304    | 50.0252 |
| 2      | 9.244         | BB   | 0.2039      | 9225.33398  | 697.29059    | 49.9748 |

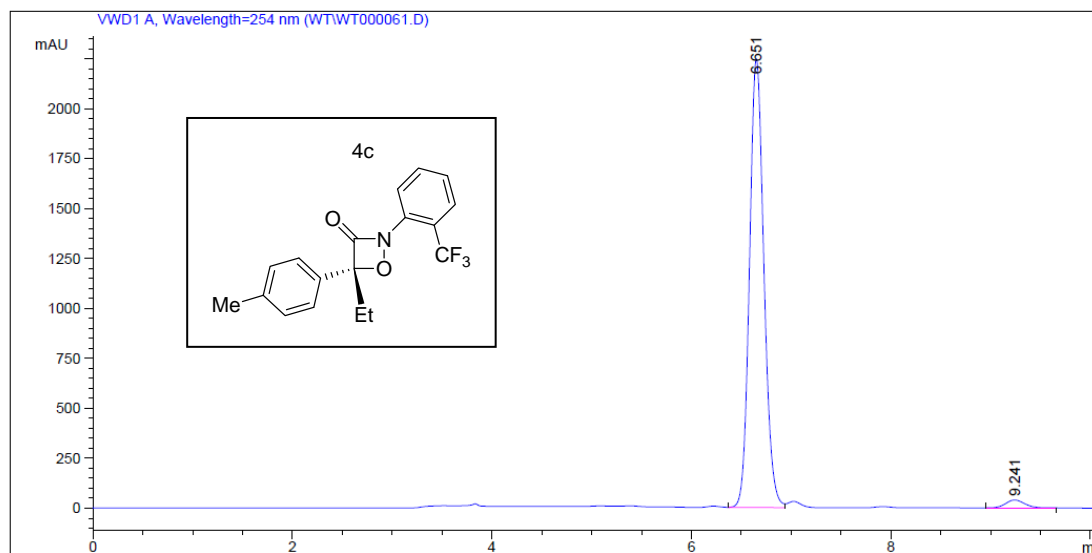

| Peak # | RetTime [min] | Type | Width [min] | Area mAU *s | Height [mAU] | Area %  |
|--------|---------------|------|-------------|-------------|--------------|---------|
| 1      | 6.651         | VV   | 0.1549      | 2.25625e4   | 2248.11304   | 97.7028 |
| 2      | 9.241         | BB   | 0.2049      | 530.49792   | 39.82845     | 2.2972  |

Sample Info : 99:1 AD-H 1ML/min

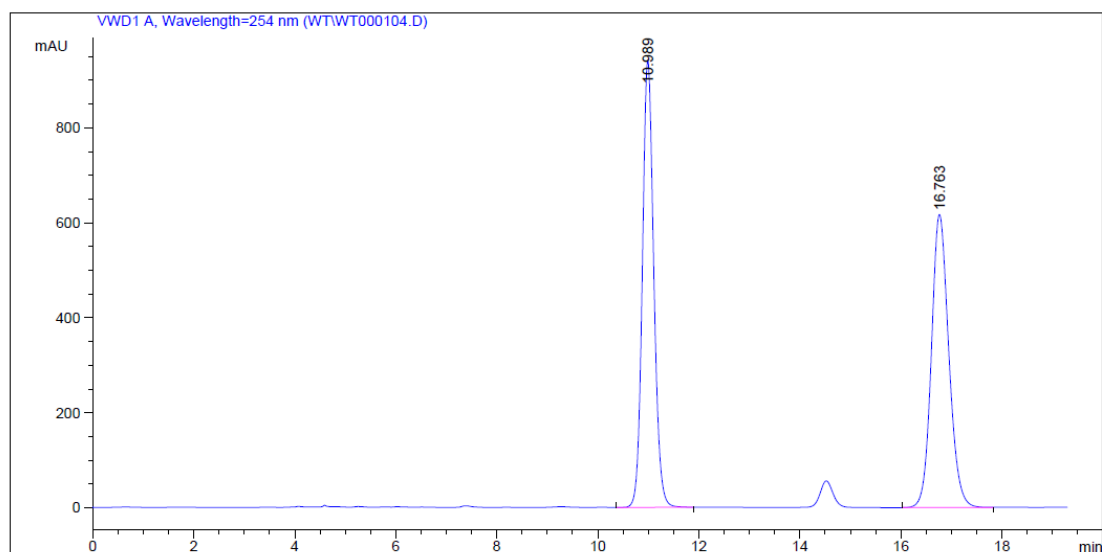

| Peak # | RetTime [min] | Type | Width [min] | Area mAU *s | Height [mAU] | Area %  |
|--------|---------------|------|-------------|-------------|--------------|---------|
| 1      | 10.989        | VB   | 0.2410      | 1.47413e4   | 940.90192    | 50.0301 |
| 2      | 16.763        | BB   | 0.3659      | 1.47236e4   | 616.67273    | 49.9699 |

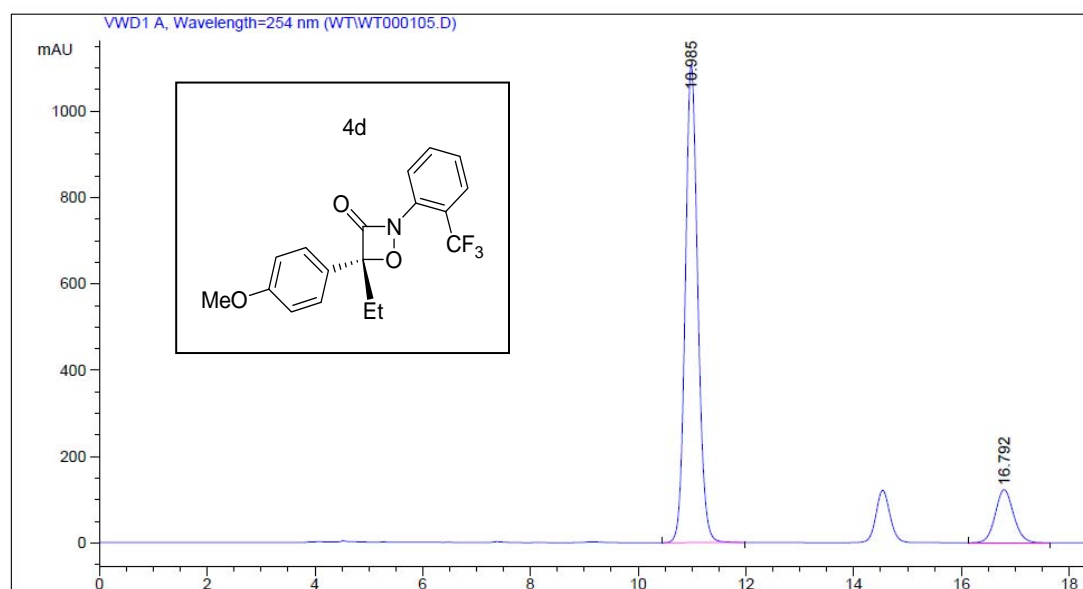

| Peak # | RetTime [min] | Type | Width [min] | Area mAU *s | Height [mAU] | Area %  |
|--------|---------------|------|-------------|-------------|--------------|---------|
| 1      | 10.985        | BB   | 0.2460      | 1.77991e4   | 1106.17871   | 85.9670 |
| 2      | 16.792        | BB   | 0.3631      | 2905.47998  | 122.93707    | 14.0330 |

Sample Info : AD-H Hex:Ipr=99:1 1.0  
 ml/min

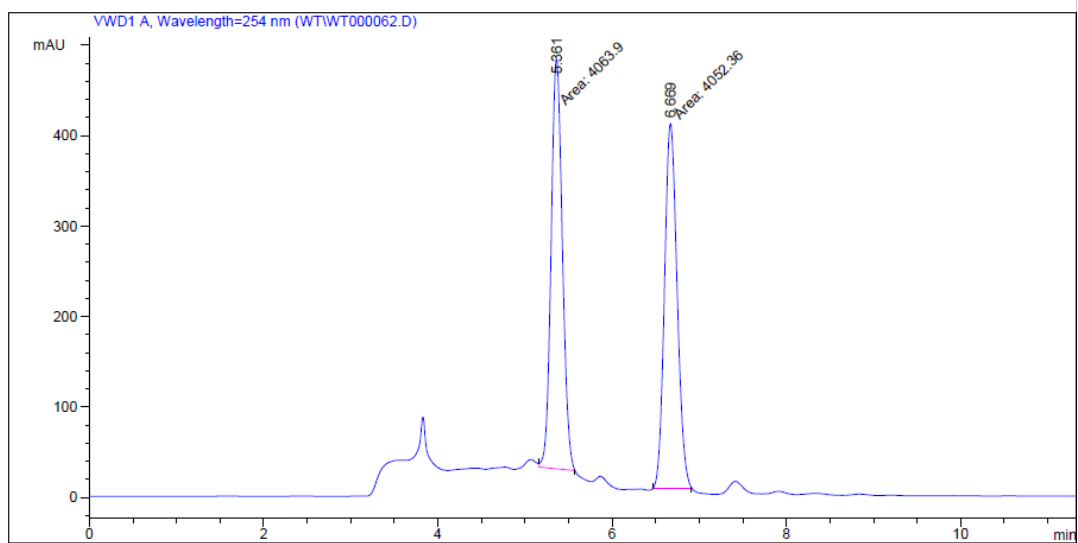

| Peak # | RetTime [min] | Type | Width [min] | Area mAU *s | Height [mAU] | Area %  |
|--------|---------------|------|-------------|-------------|--------------|---------|
| 1      | 5.361         | MM   | 0.1488      | 4063.89526  | 455.18875    | 50.0710 |
| 2      | 6.669         | MM   | 0.1668      | 4052.36401  | 404.95282    | 49.9290 |

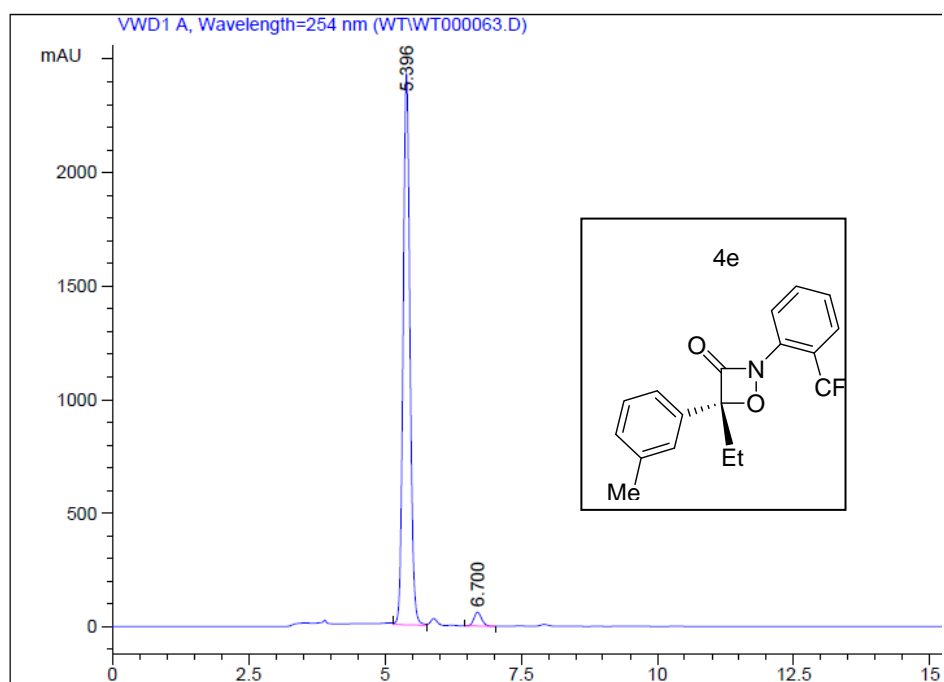

| Peak # | RetTime [min] | Type | Width [min] | Area mAU *s | Height [mAU] | Area %  |
|--------|---------------|------|-------------|-------------|--------------|---------|
| 1      | 5.396         | VV   | 0.1337      | 2.11885e4   | 2430.68848   | 97.2165 |
| 2      | 6.700         | VB   | 0.1533      | 606.66498   | 61.32587     | 2.7835  |

Sample Info : 99:1 AD-H 1ML/min

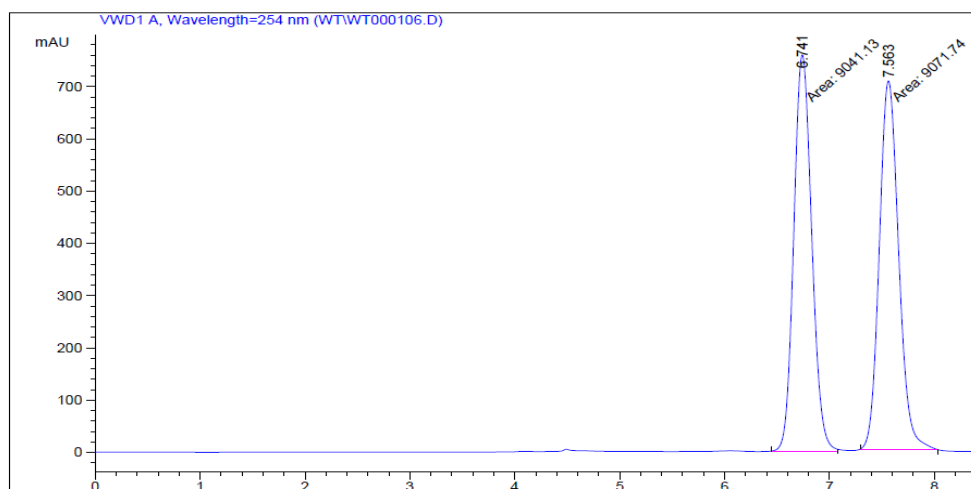

| Peak # | RetTime [min] | Type | Width [min] | Area mAU *s | Height [mAU] | Area %  |
|--------|---------------|------|-------------|-------------|--------------|---------|
| 1      | 6.741         | MM   | 0.1985      | 9041.12598  | 759.21857    | 49.9155 |
| 2      | 7.563         | MM   | 0.2141      | 9071.73730  | 706.15393    | 50.0845 |

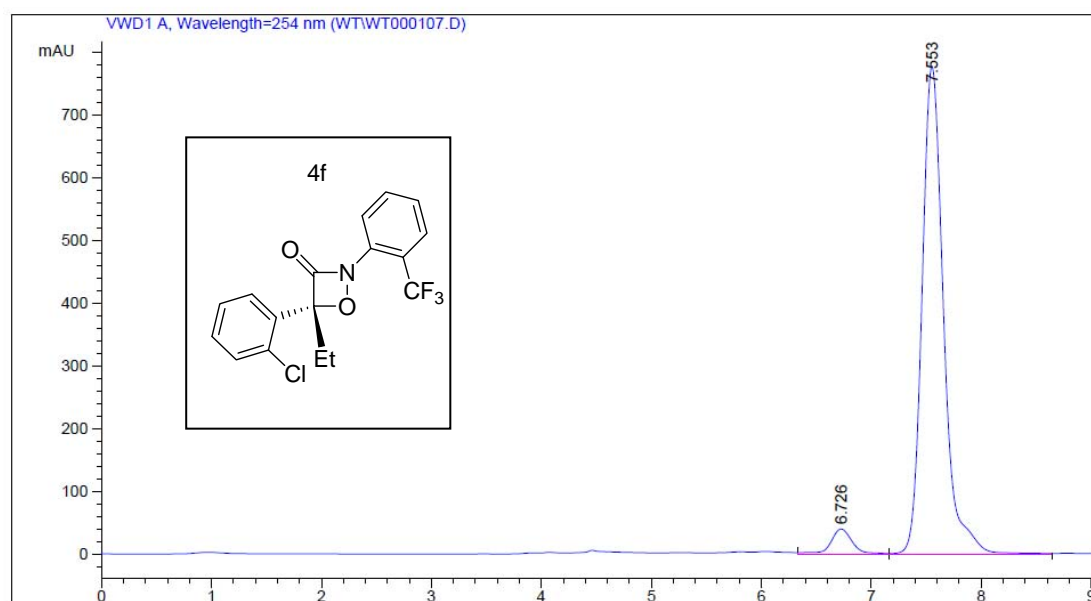

| Peak # | RetTime [min] | Type | Width [min] | Area mAU *s | Height [mAU] | Area %  |
|--------|---------------|------|-------------|-------------|--------------|---------|
| 1      | 6.726         | VV   | 0.2063      | 538.43683   | 39.69611     | 4.8655  |
| 2      | 7.553         | VB   | 0.2091      | 1.05280e4   | 776.73254    | 95.1345 |

Sample Info : ad-h, 99:1, 0.5ml/min

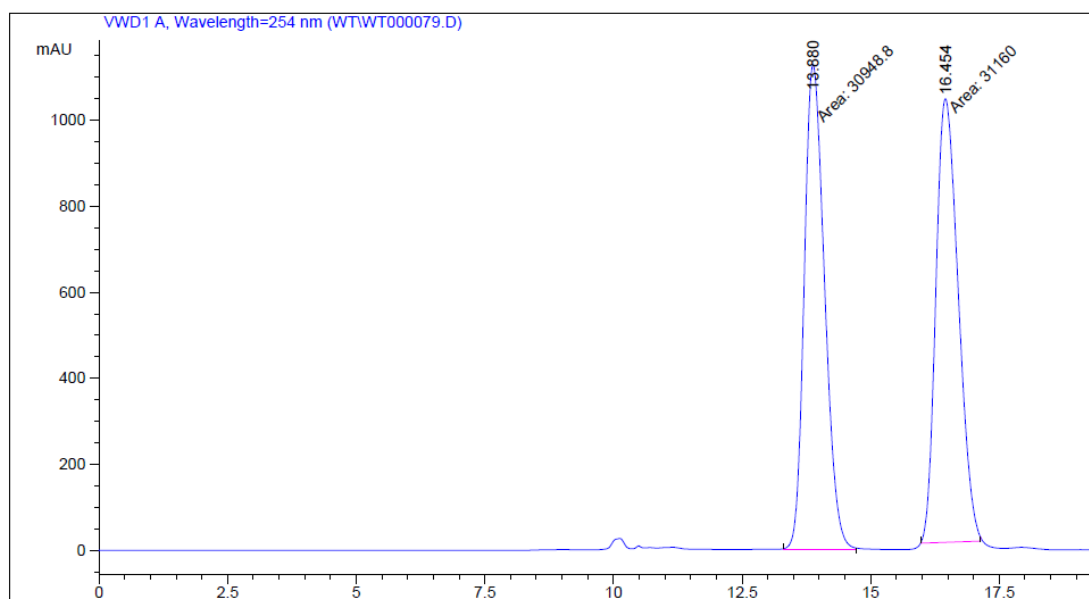

| Peak # | RetTime [min] | Type | Width [min] | Area mAU *s | Height [mAU] | Area %  |
|--------|---------------|------|-------------|-------------|--------------|---------|
| 1      | 13.880        | MM   | 0.4573      | 3.09488e4   | 1128.06274   | 49.8300 |
| 2      | 16.454        | MM   | 0.5034      | 3.11600e4   | 1031.72327   | 50.1700 |

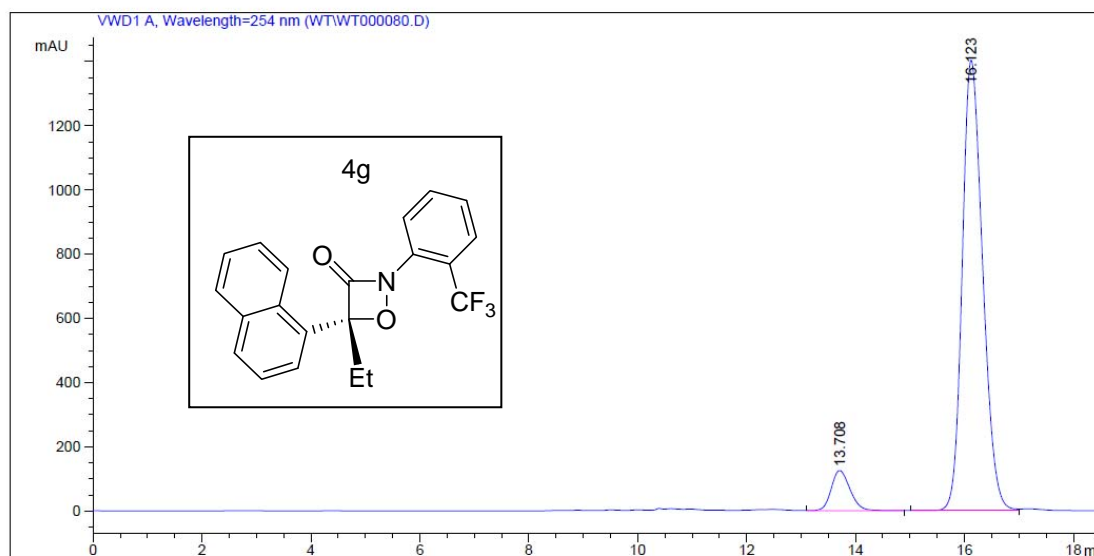

| Peak # | RetTime [min] | Type | Width [min] | Area mAU *s | Height [mAU] | Area %  |
|--------|---------------|------|-------------|-------------|--------------|---------|
| 1      | 13.708        | VB   | 0.3652      | 3026.20679  | 125.11395    | 7.6476  |
| 2      | 16.123        | BV   | 0.3999      | 3.65446e4   | 1403.42432   | 92.3524 |

Sample Info : AD-H Hex:Ipr=99:1 1.0  
 ml/min

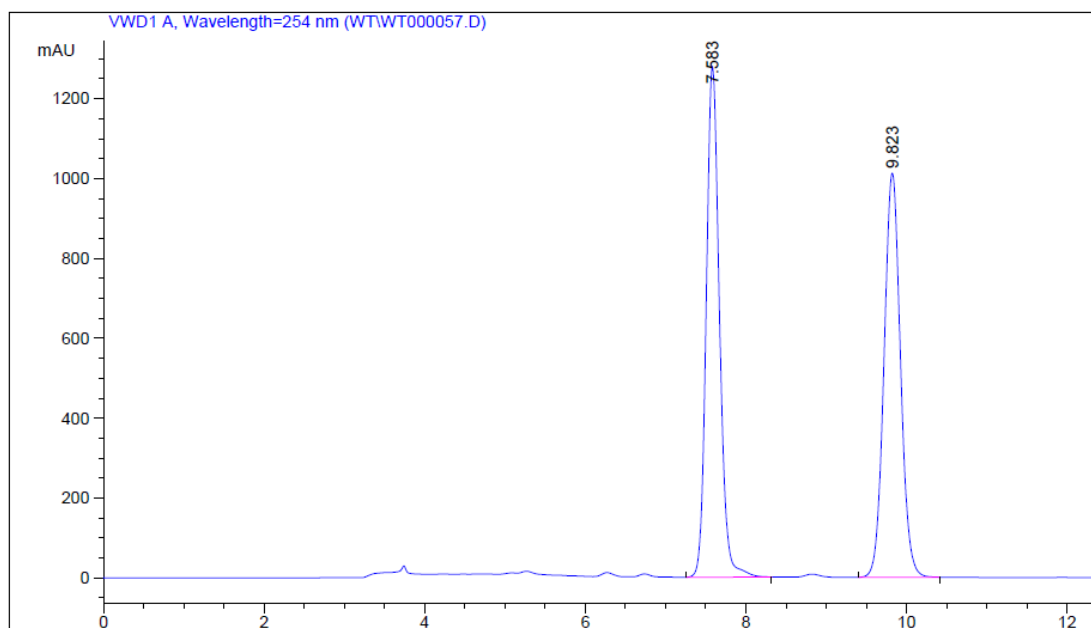

| Peak # | RetTime [min] | Type | Width [min] | Area mAU *s | Height [mAU] | Area %  |
|--------|---------------|------|-------------|-------------|--------------|---------|
| 1      | 7.583         | BB   | 0.1753      | 1.45900e4   | 1279.33301   | 50.3497 |
| 2      | 9.823         | BB   | 0.2197      | 1.43873e4   | 1012.11053   | 49.6503 |

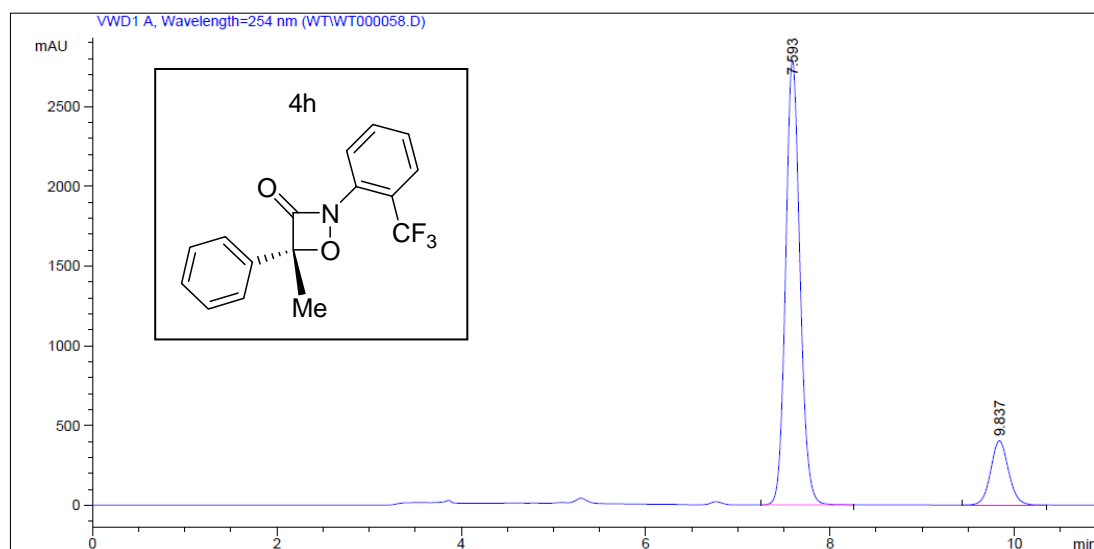

| Peak # | RetTime [min] | Type | Width [min] | Area mAU *s | Height [mAU] | Area %  |
|--------|---------------|------|-------------|-------------|--------------|---------|
| 1      | 7.593         | BB   | 0.1671      | 3.02095e4   | 2789.78320   | 84.7675 |
| 2      | 9.837         | BB   | 0.2067      | 5428.58447  | 402.97238    | 15.2325 |

Sample Info : 99:1 AD-H 1ML/min

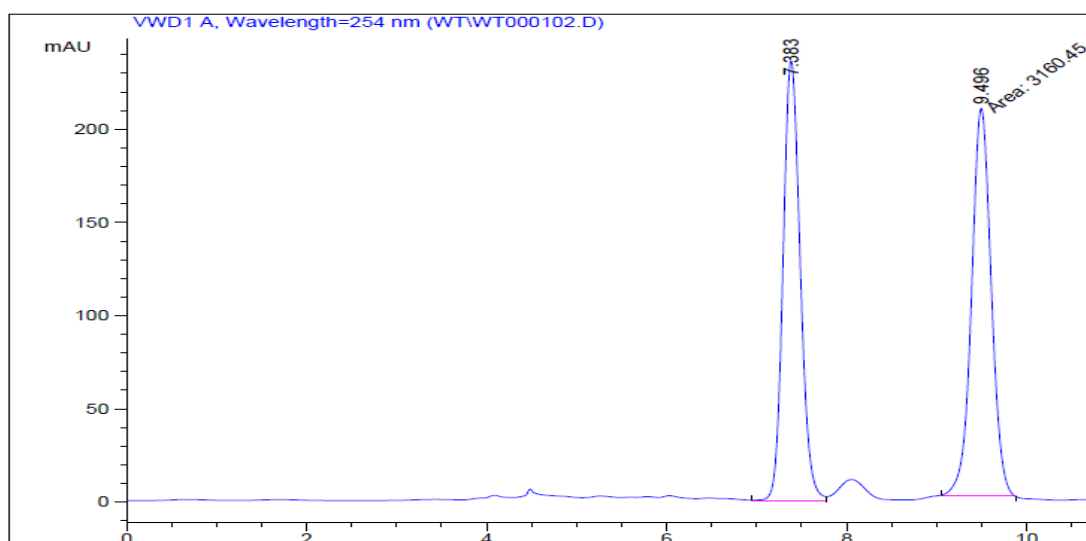

| Peak # | RetTime [min] | Type | Width [min] | Area mAU *s | Height [mAU] | Area %  |
|--------|---------------|------|-------------|-------------|--------------|---------|
| 1      | 7.383         | VV   | 0.2065      | 3116.55420  | 235.90666    | 49.6503 |
| 2      | 9.496         | MM   | 0.2532      | 3160.45337  | 207.99496    | 50.3497 |

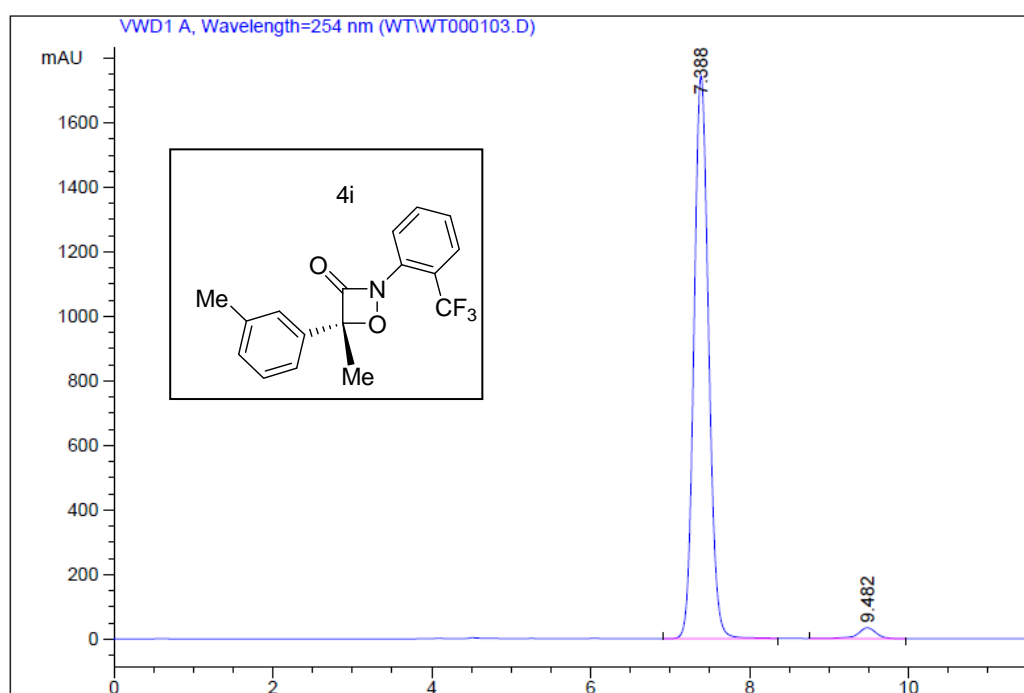

| Peak # | RetTime [min] | Type | Width [min] | Area mAU *s | Height [mAU] | Area %  |
|--------|---------------|------|-------------|-------------|--------------|---------|
| 1      | 7.388         | VB   | 0.2002      | 2.23319e4   | 1745.30627   | 97.5719 |
| 2      | 9.482         | BB   | 0.2466      | 555.72583   | 33.63765     | 2.4281  |

Sample Info : AD-H Hex:Ipr=99:1 0.5ml/min

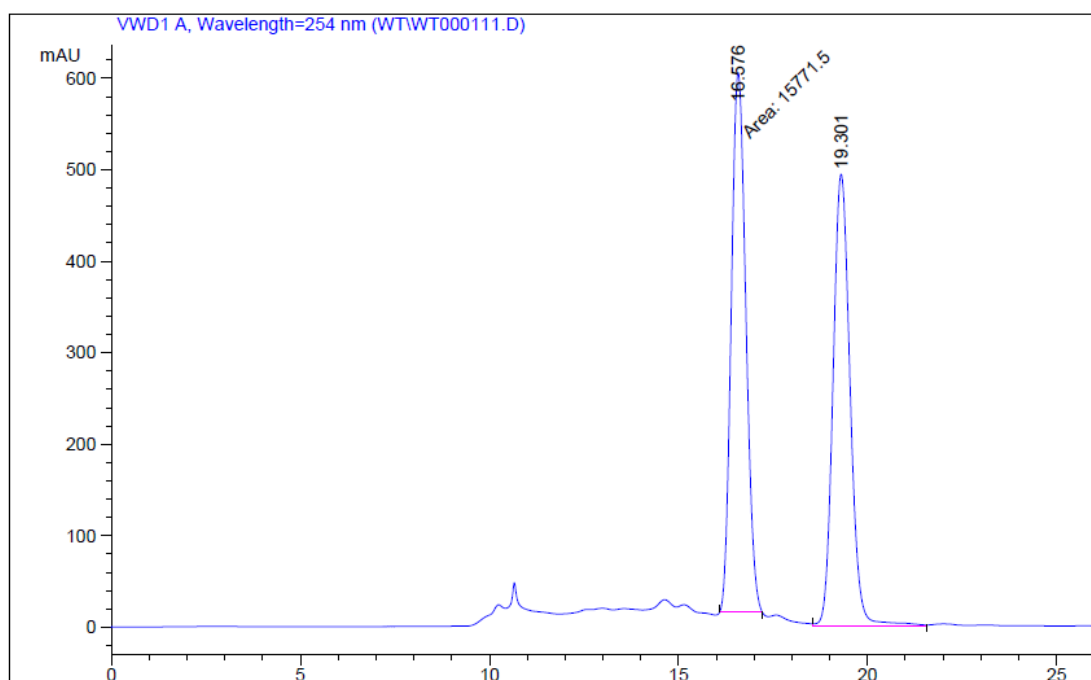

| Peak # | RetTime [min] | Type | Width [min] | Area mAU *s | Height [mAU] | Area %  |
|--------|---------------|------|-------------|-------------|--------------|---------|
| 1      | 16.576        | MM   | 0.4458      | 1.57715e4   | 589.60999    | 50.2233 |
| 2      | 19.301        | VV   | 0.4912      | 1.56313e4   | 494.37830    | 49.7767 |

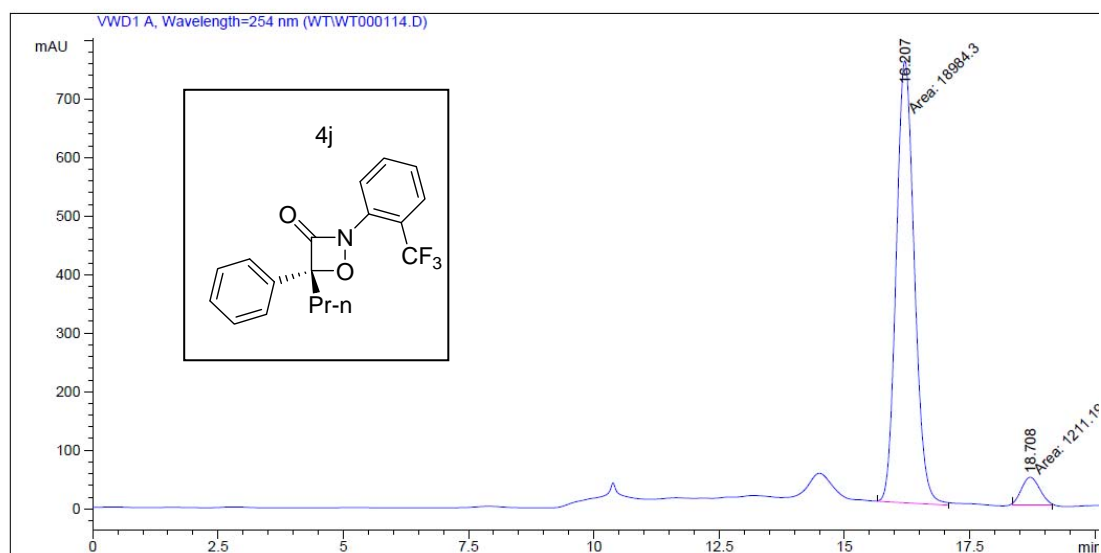

| Peak # | RetTime [min] | Type | Width [min] | Area mAU *s | Height [mAU] | Area %  |
|--------|---------------|------|-------------|-------------|--------------|---------|
| 1      | 16.207        | MM   | 0.4189      | 1.89843e4   | 755.30267    | 94.0026 |
| 2      | 18.708        | MM   | 0.4232      | 1211.19434  | 47.69992     | 5.9974  |



Sample Info : ad-h,99:1,0.5ml/min

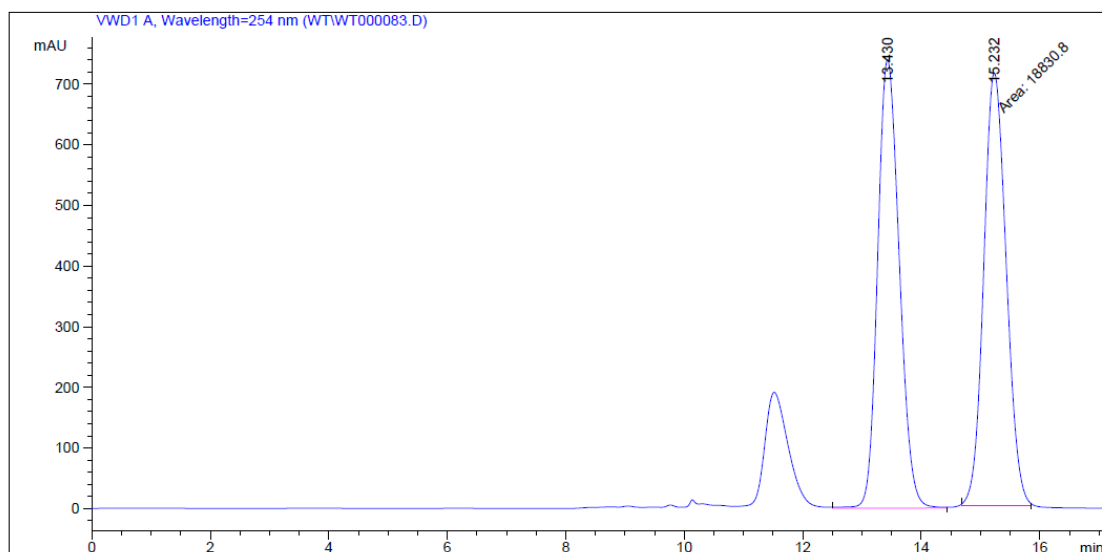

| Peak # | RetTime [min] | Type | Width [min] | Area mAU *s | Height [mAU] | Area %  |
|--------|---------------|------|-------------|-------------|--------------|---------|
| 1      | 13.430        | BB   | 0.3826      | 1.87992e4   | 739.24585    | 49.9579 |
| 2      | 15.232        | MM   | 0.4398      | 1.88308e4   | 713.60132    | 50.0421 |

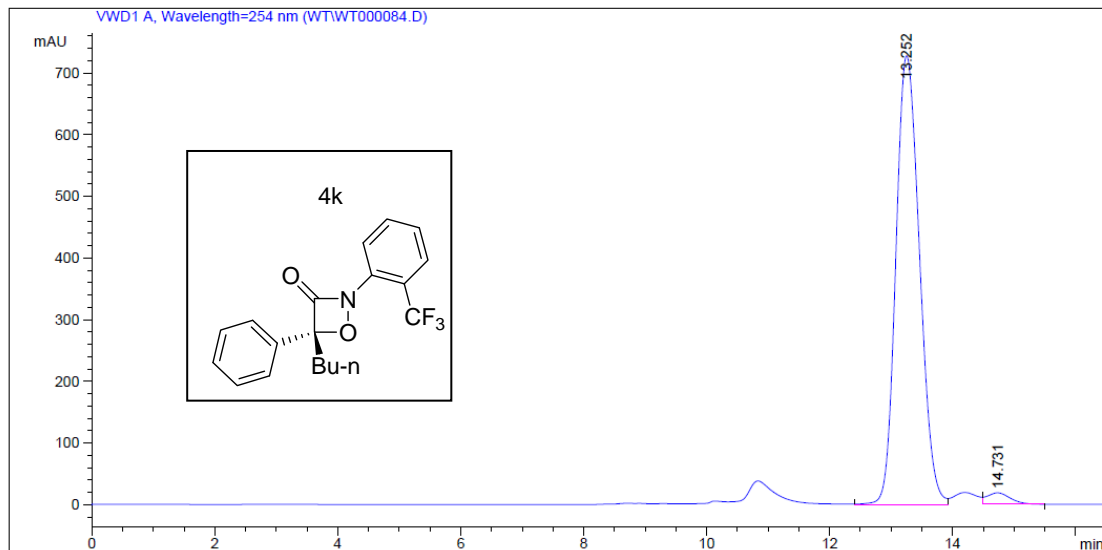

| Peak # | RetTime [min] | Type | Width [min] | Area mAU *s | Height [mAU] | Area %  |
|--------|---------------|------|-------------|-------------|--------------|---------|
| 1      | 13.252        | BV   | 0.4115      | 1.93989e4   | 727.56683    | 97.5008 |
| 2      | 14.731        | VB   | 0.3934      | 497.24149   | 18.59924     | 2.4992  |

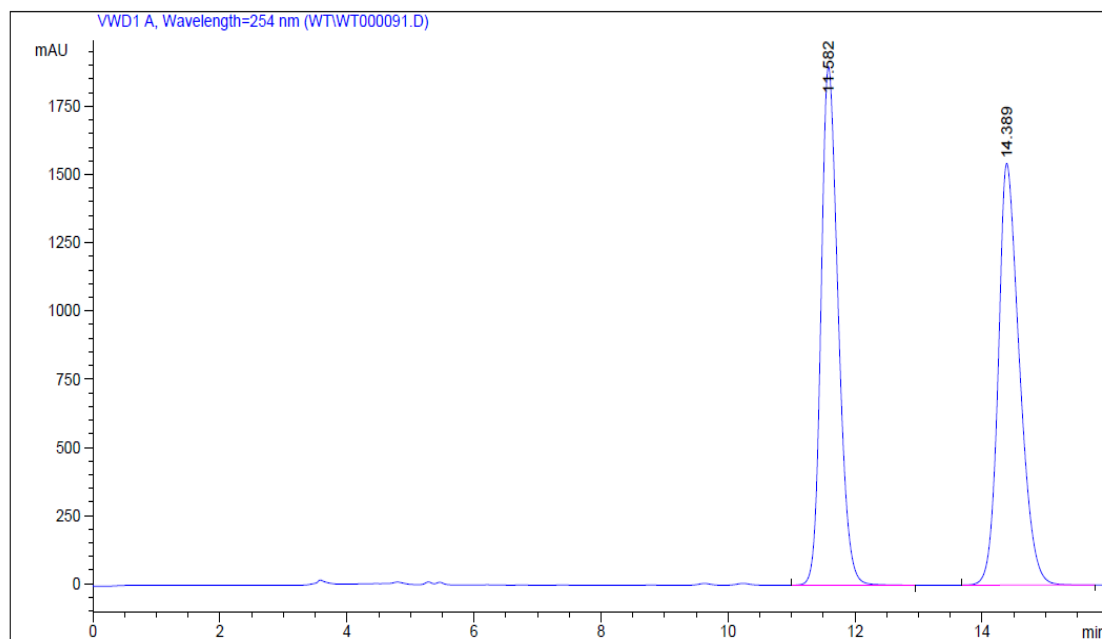

| Peak # | RetTime [min] | Type | Width [min] | Area mAU *s | Height [mAU] | Area %  |
|--------|---------------|------|-------------|-------------|--------------|---------|
| 1      | 11.582        | BB   | 0.2891      | 3.57191e4   | 1900.95178   | 49.8363 |
| 2      | 14.389        | BB   | 0.3472      | 3.59538e4   | 1545.16443   | 50.1637 |

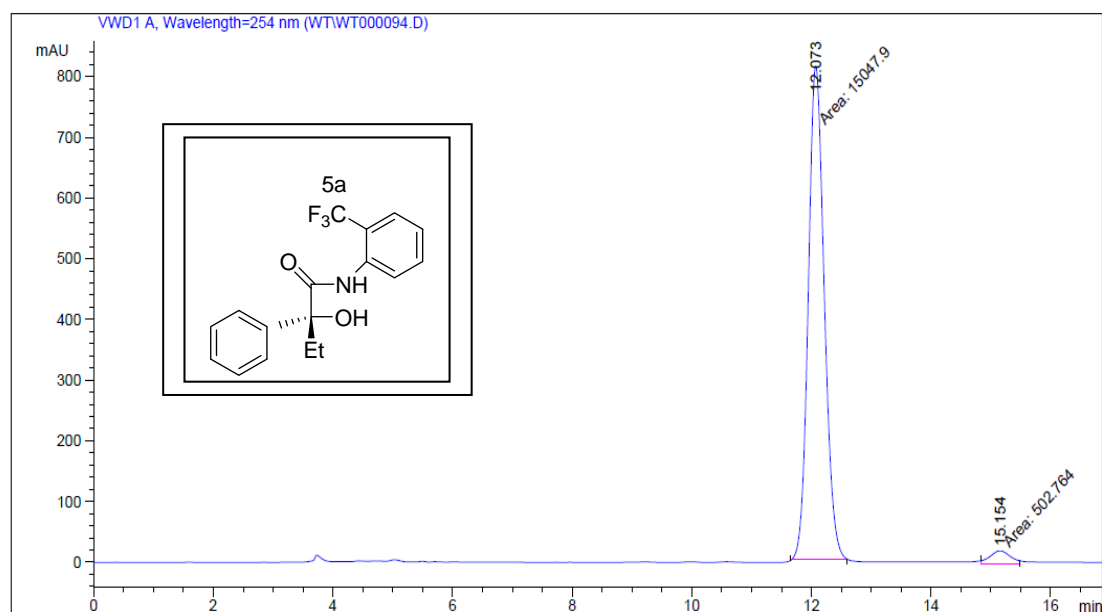

| Peak # | RetTime [min] | Type | Width [min] | Area mAU *s | Height [mAU] | Area %  |
|--------|---------------|------|-------------|-------------|--------------|---------|
| 1      | 12.073        | MM   | 0.3084      | 1.50479e4   | 813.10797    | 96.7669 |
| 2      | 15.154        | MM   | 0.3951      | 502.76425   | 21.20945     | 3.2331  |

Sample Info : AD-H, 95:5, 1ml/min

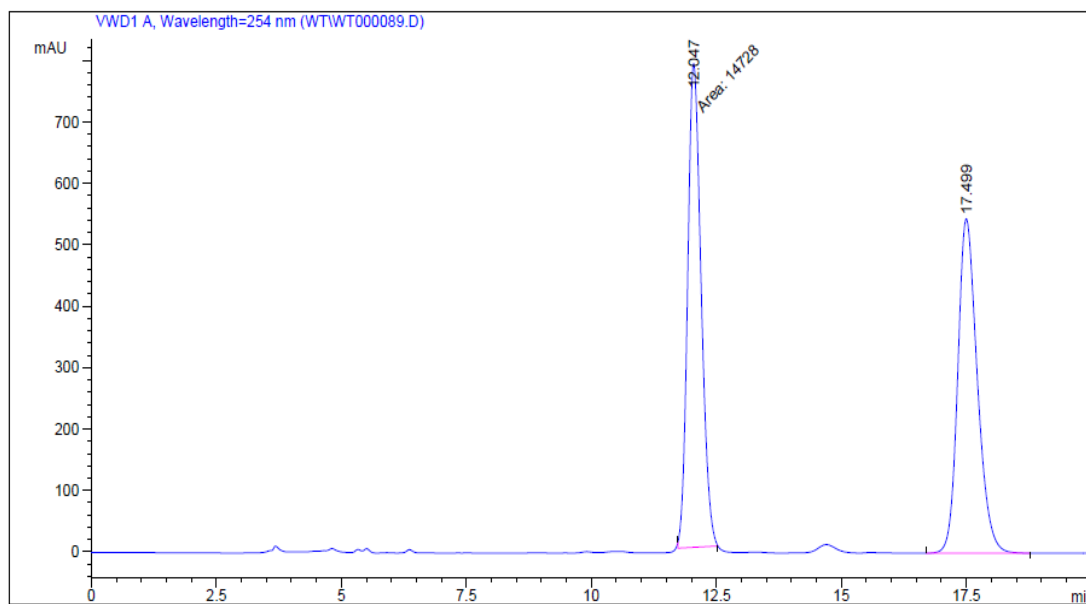

| Peak # | RetTime [min] | Type | Width [min] | Area mAU *s | Height [mAU] | Area %  |
|--------|---------------|------|-------------|-------------|--------------|---------|
| 1      | 12.047        | MM   | 0.3116      | 1.47280e4   | 787.64697    | 49.9221 |
| 2      | 17.499        | BB   | 0.4142      | 1.47739e4   | 544.34454    | 50.0779 |

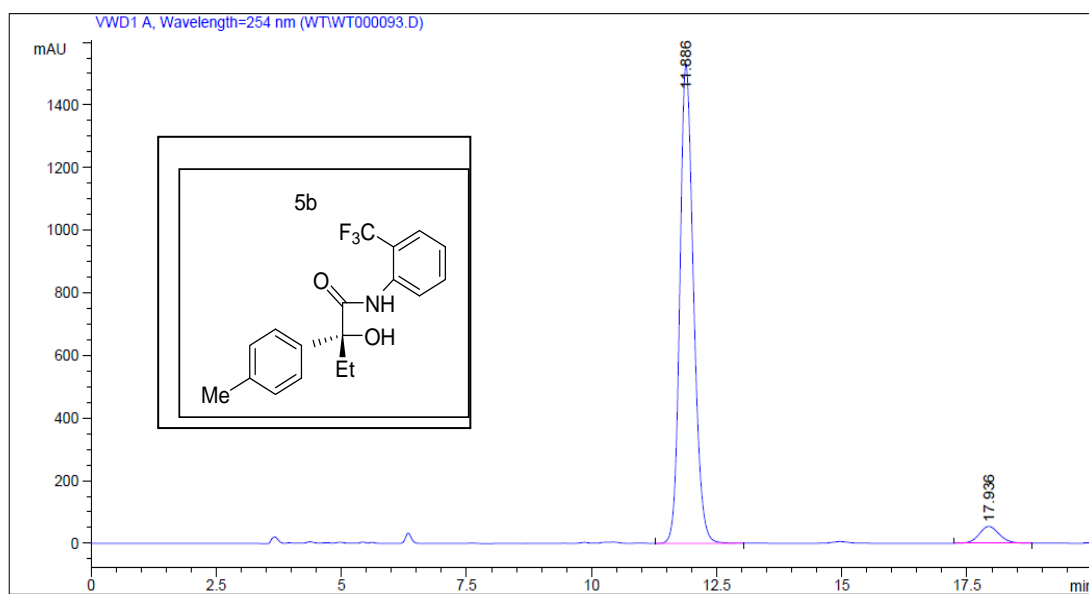

| Peak # | RetTime [min] | Type | Width [min] | Area mAU *s | Height [mAU] | Area %  |
|--------|---------------|------|-------------|-------------|--------------|---------|
| 1      | 11.886        | VB   | 0.2914      | 2.90505e4   | 1530.16760   | 95.0082 |
| 2      | 17.936        | BV   | 0.4349      | 1526.31775  | 53.94192     | 4.9918  |

## Part IV Copies of CD spectra

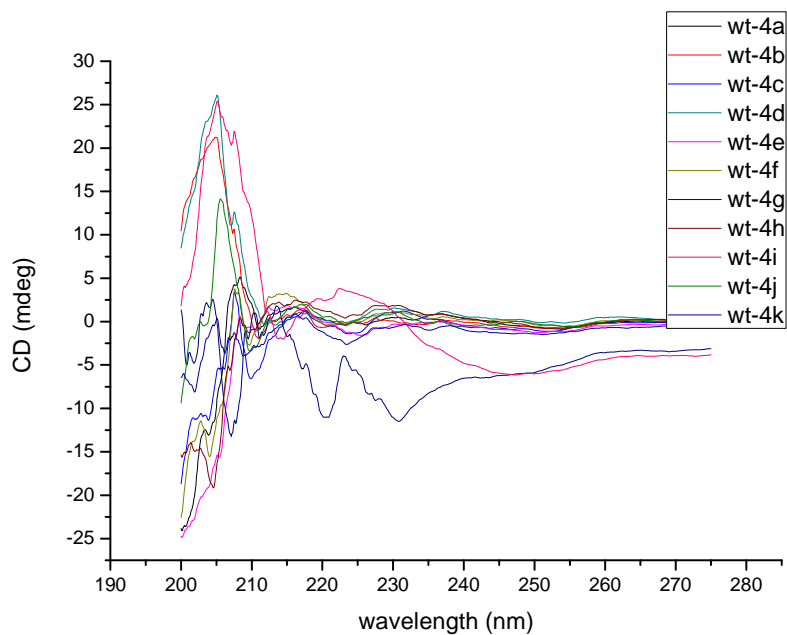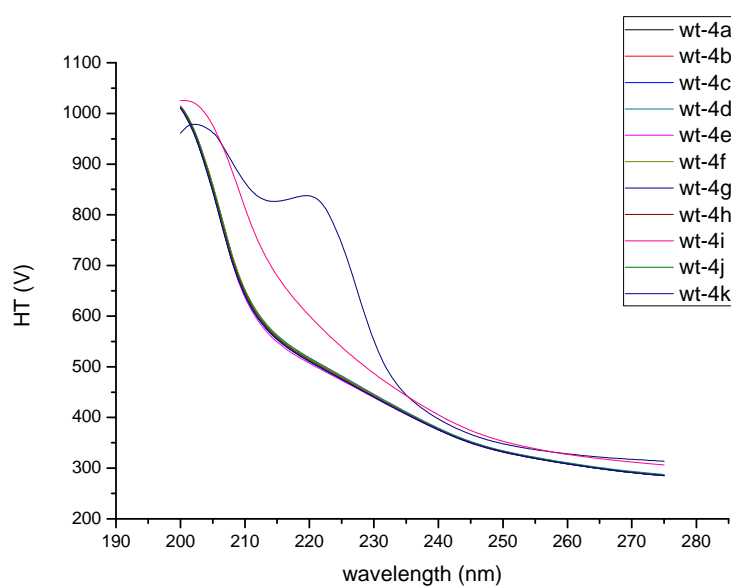

Supplement: c0ob00249f.pdf [file c0ob00249f.pdf]
